1 **Scaling patterns inform ontogenetic transitions away from cleaning in *Thalassoma* wrasses**

2

3

4 Vikram B. Baliga<sup>1\*</sup>, Rita S. Mehta<sup>1</sup>

5 <sup>1</sup>*Department of Ecology and Evolutionary Biology, Long Marine Laboratory, University of*  
6 *California Santa Cruz, Santa Cruz, CA 95060, USA*

7

8

9

10

11

12

13

14

15

16 **\*Correspondence:**

17 Vikram B. Baliga

18 Department of Ecology and Evolutionary Biology

19 University of California Santa Cruz

20 Santa Cruz, CA 95060

21 Email: vbaliga@ucsc.edu

22 **Summary:** In fishes, cleaning is a mutualistic behavior wherein a species will remove and  
23 consume ectoparasites from other organisms. More than two thirds of cleaner fishes display this  
24 behavior predominately as juveniles and discontinue cleaning as adults; such species are here  
25 referred to as “facultative cleaners”. Whether allometric changes in morphological traits coincide  
26 with ontogenetic shifts away from cleaning is unknown. We tested the hypothesis that transitions  
27 away from cleaning are associated with scaling patterns in the feeding apparatus of facultative  
28 cleaners, and then compared such patterns to those exhibited by non-cleaner congeners. We  
29 measured functional traits related to feeding, such as vertical gape distance, premaxillary  
30 protrusion distance, and maxillary kinematic transmission coefficient (KT) in each ontogenetic  
31 series of 11 *Thalassoma* wrasses (Labridae). As these fishes predominately capture prey via  
32 biting, we modeled bite force using MandibLever (v3.3) to create an ontogenetic trajectory of  
33 bite force for each species. Our results indicate that cleaner fishes in *Thalassoma*, as juveniles,  
34 possess jaws with low mobility that exhibit weaker bite forces. Additionally, there was  
35 remarkable consistency in the range of body lengths over which we observed significant  
36 differences between facultative cleaners and non-cleaners in bite force, vertical gape distance,  
37 and premaxillary protrusion distance. Through ontogeny, facultative cleaner fishes exhibit  
38 positive allometry for a number of functionally important feeding traits, which possibly obviates  
39 the need to continue cleaning.

40 **Key Words:** cleaning, scaling, functional morphology, feeding, bite force, maxillary KT,  
41 wrasses

## 42 **Introduction**

43 The consequences of size on the structure and function of organismal systems are pervasive  
44 (McMahon, 1984; Schmidt-Nielson, 1984). Therefore, it is not surprising that a central focus of  
45 functional morphology studies is to understand how the scaling of the musculoskeletal system  
46 influences the scaling of functional traits across ontogeny. Previous studies have argued that  
47 ontogenetic shifts in ecology often drive adaptive changes in the scaling of musculoskeletal  
48 systems resulting in differential performance (McMahon, 1984; Richard and Wainwright, 1995;  
49 Deban and O'Reilly, 2005; Herrell and Gibb, 2006; Pfaller et al., 2011). These studies, in turn,  
50 support the idea that allometric changes in morphology often co-occur with changes in feeding  
51 strategies, locomotor behavior, or habitat use. Fewer studies, however, have compared the  
52 ontogenetic trajectories of functional traits across closely-related species to better understand the  
53 extent to which such patterns of scaling may be specifically adaptive during a particular life  
54 history stage (but see Mitteroecker et al., 2004; Herrel and O'Reilly, 2006; Frédérick and Sheets,  
55 2009; Wilson and Sánchez-Villagra, 2010).

56  
57 Cleaning behavior provides us with the opportunity to examine both the patterns of scaling of the  
58 musculoskeletal system and shifts in feeding ecology within a clade of tropical reef fishes. In  
59 fishes, cleaning is a mutualistic behavior wherein an individual consumes ectoparasites  
60 (generally juvenile gnathiid or cymothoid isopods) off other organisms. Over 120 species of  
61 teleost fishes, from diverse lineages including wrasses, cichlids, surfperches, and gobies, exhibit  
62 this behavior (Coté, 2000; Froese and Pauly, 2014). The evolution of cleaning in fishes is  
63 especially fascinating as it represents one of the few examples of mutualistic behavior between  
64 vertebrate species (Bronstein, 1994; Poulin and Grutter, 1996). This behavior relies not only on  
65 the ability of client species to recognize cleaners but also requires that cleaners possess  
66 morphological, functional, and behavioral traits that are necessary to find and remove  
67 ectoparasites.

68  
69 Over two thirds of fishes that clean do so predominately as juveniles (Froese and Pauly, 2014),  
70 exhibiting ontogenetic transitions away from cleaning behavior. While these species are referred  
71 to as “facultative (juvenile) cleaners” in the literature (Coté, 2000), for simplicity we here refer  
72 to these species as “facultative” cleaners.

73

74 In some cases, cleaners may also consume the mucus coating of their clients. This behavior has  
75 been observed in several species including *Labroides* cleaner wrasses, as well as *Elacatinus*  
76 cleaner gobies (Gorlick, 1980; Grutter, 1997; Bshary and Grutter, 2002; Grutter and Bshary,  
77 2004; Soares et al., 2009; Soares et al., 2010). Notably, in both of these clades, cleaners are  
78 described as “obligate”, indicating that they obtain, on average, 85% of dietary items through  
79 cleaning (Coté, 2000). Here, mucivory adds an important dimension to the dynamics exhibited  
80 between cleaners and their clients. Clients appear to prefer that cleaners remove ectoparasites,  
81 yet in many cases, cleaners prefer consuming mucus (Grutter and Bshary, 2003). Mucivory is  
82 typically characterized as “cheating” from the client’s point of view, often resulting in the abrupt  
83 termination of a cleaning bout (Johnstone and Bshary, 2002; Bshary and Grutter, 2005; Bshary  
84 and Grutter, 2006). While adaptations suited for mucivory may play a substantial role in shaping  
85 the morphology of these obligate cleaners, this feeding behavior has not been observed in any  
86 facultative cleaners. Thus, an analysis of the morphology of facultative cleaners may yield  
87 crucial insights about traits that are conducive to ectoparasite removal, without the complication  
88 of accounting for morphological innovations related to mucivory.

89

90 The prevalence of cleaning behavior is greatest in the mostly coral-reef-associated clade  
91 Labridae (wrasses & parrotfishes) (Coté, 2000; Froese and Pauly, 2014). The majority of cleaner  
92 wrasses, including several members of the genus *Thalassoma*, are facultative cleaners, shifting  
93 towards dietary patterns that are very similar to those of non-cleaner congeners as adults  
94 (Bellwood et al., 2006; Froese and Pauly, 2014). The approximate sizes at which these  
95 facultative cleaners stop cleaning are reported in the literature, and observations of cleaning in  
96 these species are almost exclusively restricted to individuals that display juvenile coloration  
97 patterns (Darcy et al, 1974; Losey et al., 1994; Wicksten, 1998). Rarely do facultative cleaners  
98 continue to exhibit this behavior into adulthood. A few species, such as *Thalassoma duperrey*,  
99 clean as adults, although cleaning in the adult form of this species appears to involve the removal  
100 of parasitic barnacles from turtles (Losey et al., 1994). Therefore, individuals of *Thalassoma*  
101 cleaner species that have shifted to adult colorations (regardless of sex) are far less likely to  
102 engage in ectoparasitic isopod removal. It is unknown why facultative cleaner species exhibit

103 such shifts, or whether these species exhibit strong ontogenetic changes in morphology that  
104 accompany the change in feeding ecology.

105  
106 Most members of the *Thalassoma* clade are predators of a wide variety of benthic invertebrates,  
107 including gastropods, bivalves, urchins, and crustaceans (Table S1, see supplementary  
108 materials). As many of these prey items are usually attached to a substrate, *Thalassoma* wrasses  
109 are generally expected to employ a biting mechanism to acquire prey. Biting may be especially  
110 important to prey capture in facultative cleaners in this clade, as many of these species have been  
111 described to “pick” ectoparasites off the bodies of their clients (Hobson, 1969; Hobson, 1971;  
112 Wicksten, 1998). Facultative cleaners within the *Thalassoma* clade do not constitute a  
113 monophyletic group, suggesting that cleaning behavior appears to have a dynamic evolutionary  
114 history. While we acknowledge that all taxa in our study exhibit changes in diet as they attain  
115 larger body sizes, what unites the facultative cleaner species is their engagement in cleaning  
116 behavior as juveniles. The evolution of facultative cleaning in this clade provided us with the  
117 opportunity to explore the extent to which scaling patterns in functional traits are linked to  
118 ontogenetic shifts away from cleaning behavior.

119  
120 In this study, we focused on characterizing the ontogeny of functional traits in several members  
121 of the monophyletic group comprised of two genera, *Thalassoma* and *Gomphosus*. We aimed to  
122 test the hypothesis that transitions away from cleaning are associated with informative scaling  
123 patterns in the feeding apparatus. Our aims were to: 1) identify whether facultative cleaners  
124 exhibit different scaling patterns in traits related to feeding when compared to non-cleaners, and  
125 2) to determine whether scaling patterns in feeding traits correspond with shifts away from  
126 cleaning.

127

## 128 **Results**

129

### 130 *Allometry of traits*

131 Disparate patterns of scaling emerged when we examined the ontogeny of vertical gape distance,  
132 maxillary KT, jaw protrusion distance, and bite force for *Thalassoma* wrasses (Fig. 1; see also

133 Fig. S1 in supplementary materials for species-specific patterns). The majority of *Thalassoma*  
134 wrasses exhibited some form of allometry in these functional traits. *Gomphosus varius* showed  
135 the most consistent pattern of allometry across all four traits, exhibiting negative allometry in  
136 each case. Generally, for each trait, no more than three species exhibited isometry.

137 All wrasses exhibited strong relationships between  $\log_{10}$  vertical gape distance and  $\log_{10}$  body  
138 length ( $R^2 = 0.94-0.99$ , all  $p$ -values  $< 0.0001$ ; Table S2 in supplementary material). The SMA  
139 regression slopes ranged from 0.51 to 1.58. While non-cleaner taxa exhibited either isometry or  
140 negative allometry for vertical gape distance, facultative cleaners almost universally exhibited  
141 positive allometry (Fig. 1A). *Thalassoma duperrey* was the only facultative cleaner to exhibit  
142 isometry for this trait.

143 The relationships between  $\log_{10}$  premaxillary protrusion distance and  $\log_{10}$  body length (Fig. 1B)  
144 were strong and varied substantially ( $R^2 = 0.60-0.98$ , all  $p$ -values  $< 0.0001$ ; Table S3 in  
145 supplementary material). The SMA regression slopes ranged from 0.62 to 2.46. Compared to an  
146 isometric slope of 1.0, seven species exhibited positive allometry; only three species (two of  
147 which were non-cleaners) exhibited isometric trends.

148 The relationship between  $\log_{10}$  bite force and  $\log_{10}$  body length (Fig. 1C) was strong across all  
149 species ( $R^2 = 0.92-0.99$ , all  $p$ -values  $< 0.0001$ ; Table S4 in supplementary material). The SMA  
150 regression slopes ranged from 1.16 to 2.96. All but one of the facultative cleaner species (*T.*  
151 *bifasciatum*) showed positive allometry for this trait, while only one non-cleaner (*T. rueppellii*)  
152 shared this trend.

153 Wrasses in this study universally showed strong negative allometry for maxillary KT (Fig. 1D).  
154 The SMA regressions yielded slopes that ranged from -0.38 to -1.08 ( $R^2 = 0.90-0.98$ , all  $p$ -values  
155  $< 0.0001$ ; see Table S5 in supplementary material). All  $t$ -tests designed to test the hypothesis that  
156 slope was different from 0 (as predicted by isometry) indicated strong, significant deviations  
157 from isometry (all  $p$ -values  $< 0.0001$ ).

#### 158 *Allometric differences between facultative cleaners and non-cleaners*

159 Through a series of Šidák-corrected two-sample  $t$ -tests, we found significant differences in mean  
160 slopes between facultative cleaners and non-cleaners in only two traits:  $\log_{10}$  vertical gape  
161 distance and  $\log_{10}$  bite force (Table 1). Here, we observed that facultative cleaners exhibited

162 steeper slopes for both  $\log_{10}$  vertical gape distance ( $t_9 = 4.11$ ,  $p = 0.021$ ; Table 1) and  $\log_{10}$  bite  
163 force ( $t_9 = 2.66$ ,  $p = 0.046$ ; Table 1).

#### 164 *Results of the Wilcoxon procedure*

165 We employed the Wilcoxon procedure to each trait analysis to compare the regression line of each  
166 non-cleaner with those of facultative cleaners, allowing us to identify the regions where the data  
167 in each pairwise comparison begin to overlap. For  $\log_{10}$  vertical gape distance, the regression line  
168 of each facultative cleaner intersected those of 1 to 4 non-cleaner species (Table 2). In 18 cases  
169 (out of 30 total comparisons), the Wilcoxon procedure identified regions of overlap beginning at  
170  $\log_{10}$  body lengths of  $1.81 \pm 0.0081$  (mean  $\pm$  s.d.), indicating that overlap of data did not  
171 occur until species attained a body length of  $63.98 \pm 12.03$  mm. Thus, these results indicate that  
172 juvenile facultative cleaners smaller than  $63.98 \pm 12.03$  mm exhibited significantly lower  
173 vertical gape distances compared to non-cleaners (Fig. 1A).

174 Our analysis of  $\log_{10}$  premaxillary protrusion distance indicated that the regression line of each  
175 facultative cleaner intersected those of 1 to 3 non-cleaner species (Table 2). In 9 cases, the  
176 Wilcoxon procedure identified regions of overlap beginning at  $\log_{10}$  body lengths of  $1.79 \pm 0.101$   
177 (mean  $\pm$  s.d.), revealing that overlap in regression lines did not occur until pairs of species  
178 attained body lengths of  $62.12 \pm 14.52$  mm (Fig. 1B). The nature of regression line overlap for  
179 this trait presents a heterogeneous pattern; here, two non-cleaner species, *T. amblycephalum* and  
180 *T. quinquevittatum*, exhibited smaller premaxillary protrusion distances as juveniles than did  
181 some of the facultative cleaner species (Fig. 1B).

182 For  $\log_{10}$  bite force, the regression line of each facultative cleaner intersected those of 1 to 4 non-  
183 cleaner species (Table 2). In 14 total cases, the Wilcoxon procedure revealed regions of overlap  
184 beginning at  $\log_{10}$  body lengths of  $1.78 \pm 0.0092$  (mean  $\pm$  s.d.). This indicated that overlap in  
185 bite force did not occur until both species reached a body length of  $59.50 \pm 12.71$  mm (Fig.  
186 1C).

187 The Wilcoxon procedure identified 3 cases of significant overlap in regression lines for maxillary  
188 KT (Table 2). The regression line of each facultative cleaner intersected those of 1 to 5 non-  
189 cleaner species. The regions of overlap began at  $\log_{10}$  body lengths of  $2.05 \pm 0.13$  (s.d.),

190 indicating that overlap did not occur until species reached body lengths of 112.05 +/- 32.65 mm  
191 (Fig. 1D).

192 For all of the above traits, with the exception of maxillary KT, the  $\log_{10}$  body lengths at which  
193 data overlap began (identified by the Wilcox procedure) were similar. To understand whether  
194 facultative cleaners and non-cleaners converged at critical body sizes that correspond to juvenile  
195 or adult color phases, we conducted a *post-hoc* analysis. We used a two-sample *t*-test of means to  
196 compare the body lengths of the largest specimens with juvenile color patterns in facultative  
197 cleaners with those in non-cleaners. We found no significant difference in these body lengths  
198 between facultative cleaner and non-cleaner species ( $t_9 = -0.78$ ,  $p = 0.46$ ). Our recorded range of  
199 body lengths for specimens with juvenile coloration patterns and those with adult coloration  
200 patterns is shown in Table S6 (see supplementary materials). The body lengths of the largest  
201 juvenile-colored specimen in each facultative cleaner species was 64.28 +/- 3.12 mm (mean +/-  
202 s.d.), while the body length of the largest juvenile-colored non-cleaner specimen was 66.14 +/-  
203 4.78 mm (mean +/- s.d.).

#### 204 *Investigating trends in bite force*

205 Our multiple regression analysis captured a large amount of the variation in bite force for each  
206 species (Adjusted  $R^2 = 0.93$ - $0.99$ , all  $p$ -values  $< 0.00001$ ). In general, the  $\log_{10}$  mass of the A2 or  
207 A3 muscle had the largest CAR score, revealing that these variables contribute the greatest to  
208 bite force in both facultative cleaners and non-cleaners (Table 3). In two cases (corresponding to  
209 *T. hardwicke*, a non-cleaner, and *T. pavo*, a facultative cleaner), the fiber length of the A3 had  
210 the highest CAR score. We thus found that ontogenetic changes to muscle sizes generally  
211 contributed more strongly to the ontogenetic patterns in bite force than did changes in the  
212 mechanical advantage associated with either muscle. Using MANOVA, we found no significant  
213 differences between the CAR scores of all six variables according to the category (facultative  
214 cleaner vs. non-cleaner) to which species belonged (Wilk's  $\Lambda_{6,4} = 0.54$ ,  $p = 0.74$ ).

215 The allometric patterns of each of the six traits we used in the multiple regression analyses are  
216 depicted in Fig. 2. The ontogenetic patterns of residual mechanical advantage for the A2 and the  
217 A3 muscles varied widely across species (Fig. 2A, B). Slopes varied from -0.12 to 0.16 for the  
218 former and from -0.22 to 0.25 for the latter (Tables S6 and S7, see supplementary materials).



219 Over ontogeny, both facultative cleaners and non-cleaners generally exhibited negative allometry  
220 or isometry for  $\log_{10}$  A2 mass (Fig. 2C). Only two species, *T. lutescens* and *G. varius*, showed  
221 positive allometry. We found similar results when analyzing the ontogeny of  $\log_{10}$  A3 mass (Fig.  
222 2D). A single outlier, *T. lutescens*, exhibited the only positively allometric relationship, with a  
223 slope value of 4.10. Further SMA regression information for these traits is available in Tables S8  
224 and S9 (see supplementary materials).

225 Most species ( $n=7$ ) exhibited negative allometry for  $\log_{10}$  A2 fiber length (Fig. 2E), with two  
226 species, *T. rueppellii* and *T. amblycephalum* characterized by extremely shallow slopes (0.46 and  
227 0.66, respectively). An additional three species showed isometry for this trait, while only *T.*  
228 *duperrey* and *T. pavo* exhibited positive allometry. We observed similar patterns for  $\log_{10}$  A3  
229 fiber length. Again, *T. rueppellii* and *T. amblycephalum* showed markedly shallower slopes than  
230 most species (0.51 and 0.59, respectively), and *T. duperrey* and *T. pavo* again exhibited positive  
231 allometry. Further SMA regression information for these traits is available in Tables S10 and  
232 S11 (see supplementary materials).

233 A series of Šidák-corrected two-sample *t*-tests found no differences between slope means  
234 between facultative cleaners and non-cleaners for any of these bite-force-related traits (Table 1).

## 235 **Discussion**

236 Our data reveal that as juveniles, facultative cleaner fishes tended to exhibit lower bite forces,  
237 lower maxillary KT's, and smaller vertical gape distances compared to juvenile non-cleaner  
238 congeners. In a number of cases, facultative cleaners exhibited smaller premaxillary protrusion  
239 distances as juveniles, but this was not consistent across all species. There was remarkable  
240 consistency in the range of body lengths over which we observed significant differences between  
241 facultative cleaners and non-cleaners in bite force, vertical gape distance, and premaxillary  
242 protrusion distance. Facultative cleaner species generally appeared to exhibit lower trait values  
243 until they attained, on average, a body length of roughly 62 mm. This body length coincides  
244 closely with the approximate body lengths at which facultative cleaners in our dataset switched  
245 from juvenile to adult coloration (roughly 64 mm). As body length increased beyond this  
246 threshold, the disparity in functional traits between facultative cleaners and their non-cleaner  
247 relatives no longer achieved statistical significance. Thus, the body lengths at which we first

248 found overlap between facultative and non-cleaner species in feeding traits correspond with the  
249 body lengths over which these species shift from juvenile to adult coloration patterns. Only in the  
250 case of maxillary KT did the point at which facultative cleaners and non-cleaners exhibit  
251 substantial overlap occur well after the phase transition for each pair of species.

252  
253 Collectively, these regression analyses enable us to summarize the chronology of the ontogeny of  
254 feeding traits in facultative cleaners and non-cleaners. As *Thalassoma* wrasses increase in body  
255 size, disparities in bite force are the first to disappear, driven primarily by the scaling of A2 or  
256 A3 muscle masses. Increases in bite force are followed by increases in premaxillary protrusion  
257 and vertical gape distance. Facultative cleaners do not show convergence in maxillary KT with  
258 non-cleaner congeners until well into adulthood.

#### 259 *The ontogeny of maxillary KT in wrasses*

260 Maxillary KT is often used to assess the functional implications of diverse shapes observed in  
261 the anterior-jaws four-bar linkage system in wrasses (Westneat, 1995; Hulsey and Wainwright,  
262 2002; Wainwright et al., 2004). Such studies often generate species-mean values of maxillary KT  
263 to assess functional diversity across species, yet few have explored intraspecific diversity in this  
264 trait (but see Westneat, 1994). The large range of maxillary KTs exhibited by individuals in our  
265 dataset is intriguing. *Thalassoma hardwicke*, a non-cleaner, exhibited the largest range of  
266 maxillary KT for a species, with a range of 0.64 (from 1.45 to 0.81). Surprisingly, the range of  
267 maxillary KTs exhibited over the ontogeny of this species alone overlapped species-mean  
268 maxillary KT values reported for 66 species of wrasses and parrotfishes on the Great Barrier  
269 Reef (Wainwright et al., 2004). Our data support the notion that ontogenetic trajectories have the  
270 potential to increase functional disparity in an already diverse system. Though *T. hardwicke*  
271 exhibited the largest range in maxillary KT over ontogeny, the median range for species in our  
272 dataset was 0.51. Thus, *Thalassoma* wrasses exhibited substantial change in maxillary KT over  
273 ontogeny. Our findings reveal the importance of considering the ontogenetic trajectories of traits  
274 when quantifying inter- and intra-specific patterns of diversity.

#### 275 *The morphological basis for cleaning in Thalassoma*

276 Behavioral descriptions of juvenile fishes continuously “picking” ectoparasites from the bodies  
277 of their respective client organisms have contributed towards our superficial understanding of  
278 cleaning behavior (Darcy et al., 1974; Losey et al., 1994). Previously, researchers have described  
279 the mouth movements of cleaner fishes as precisely and repetitively “picking” ectoparasites off  
280 clients (Hobson, 1969; Hobson, 1971; Darcy et al., 1974; Wicksten, 1998). The functional  
281 morphology of this behavior, however, has not been systematically studied, and details of how  
282 prey capture occurs are lacking. The term “picking” has also been used to describe a form of  
283 biting prey capture in some cichlids (Liem, 1979), and embiotocids and labrids (Horn and  
284 Ferry-Graham, 2006), whereby small, sessile prey are dislodged from a substrate. Here, precise  
285 and repeated movements of the upper jaws allow protruding teeth to be used as a prehensile tool  
286 (Liem, 1979). In Cyprinodontiformes, “picking” is also used to describe precisely-controlled and  
287 coordinated “forceps-like” movements of the upper and lower jaws (Ferry-Graham et al., 2008;  
288 Hernandez et al., 2009). In contrast to other forms of biting, cyprinodontiform picking involves  
289 the acquisition of individual prey items (small invertebrate prey) from the substrate or water  
290 column, while other items are left behind (Hernandez et al., 2008). The fine-tuned precise  
291 movements underlying the picking behavior in cyprinodontiform taxa are associated with a  
292 morphological novelty in the premaxillomandibular ligament connecting the upper and lower  
293 jaws (Hernandez et al., 2008). Whether picking in cleaner fishes is similar to the picking  
294 behavior observed in other taxa is unknown and can only be determined with future kinematic  
295 studies. We hypothesize that cleaner fishes employ a similar feeding strategy using precise,  
296 coordinated movements of the jaws; such would allow the cleaner to remove targeted items from  
297 a client’s body, leaving little room for error in haphazardly biting into the client itself. In the  
298 present study, we find that a combination of traits (a small vertical gape, small bite force, low  
299 maxillary KT, and, in some cases, a low premaxillary protrusion distance) underlie the “picking”  
300 seen in facultative *Thalassoma* cleaner fishes.

301  
302 A low maxillary KT in cleaners (compared to that of juvenile non-cleaners) indicates an  
303 alteration of the four-bar linkage system that reduces the overall displacement of the structures  
304 involved. While oral jaws with higher values of maxillary KT tend to be characterized as  
305 “velocity-modified” (Westneat, 1994), this categorization may better apply to suction-based prey  
306 capture events, wherein the jaws need to rapidly expand (Westneat, 1994; Hulsey and

307 Wainwright, 2002; Wainwright et al., 2004). In the context of biting behaviors, it may be better  
308 to characterize systems with higher values of KT as “displacement-modified”, as the actions of  
309 jaw opening and closing involve greater overall displacement. If the “picking” behavior of  
310 cleaners occurs via biting attached prey in a repetitive, cyclical manner, an overall reduction in  
311 displacement (i.e. lower maxillary KT) could allow for a higher frequency of the bite cycle.  
312 Here, a small vertical gape and low premaxillary protrusion would similarly reduce the overall  
313 displacement incurred during a single bite cycle of opening and closing. Furthermore, as noted  
314 by Hulsey and Wainwright (2002), lower values of KT transmit more force to the maxilla as the  
315 lower jaw closes. This may further aid species that consume prey attached to a substrate by  
316 maximizing force transmission to the upper jaw when the oral jaws make contact to bite into or  
317 pull off the prey. Corroborated by the observed reduction in vertical gape, and in some cases,  
318 premaxillary protrusion distance, our results indicated that juvenile *Thalassoma* facultative  
319 cleaner fishes may rely on low-displacement, rapid bite cycles to consume ectoparasites attached  
320 to their client species.

321  
322 Significant differences in bite force between facultative cleaners and non-cleaners in the juvenile  
323 condition add to the functional disparities between these two groups. Facultative cleaners are  
324 limited in bite force as juveniles, which appears to present little problem to cleaning, given that  
325 the ectoparasites consumed have thus far been reported to be small (typically <1.5 mm diameter),  
326 thin-shelled juvenile gnathiid or cymothoid isopods (Losey, 1972; Losey, 1974; Darcy et al.,  
327 1974; Davies, 1981; Grutter, 1996). Through ontogeny, however, the strong positively-allometric  
328 trends in bite force observed in these species enable them to exhibit bite forces similar to those of  
329 adult non-cleaner congeners, potentially allowing facultative cleaner species to exploit new prey  
330 or expand their prey breadth. Though this allometry seems to be largely driven by ontogenetic  
331 changes to the masses of the A2 and A3 subdivisions, this pattern of development was not  
332 unique to facultative cleaners. We were unable to find a clear, consistent pattern to indicate the  
333 mechanism via which facultative cleaner species undergo stronger allometry in bite force than do  
334 their non-cleaner congeners. It thus appears that facultative cleaner fishes experience sharp  
335 allometric trends in bite force through a diversity of ontogenetic patterns.

336 *Why clean?*

337 Juvenile facultative cleaners ostensibly appear to be at a functional disadvantage to sympatric,  
338 juvenile non-cleaner congeners. We suggest that these reduced suites of mechanical features, low  
339 maxillary KT, small gape, and low bite force, in *Thalassoma* wrasses may have evolved as a  
340 result of competitive displacement. *Thalassoma* wrasses co-occur, often in great abundances, in  
341 many tropical regions including but not limited to the Indian Ocean, the Indo-Pacific, and the  
342 Caribbean (Randall et al., 1997; Geange, 2010; Geange et al., 2013; Froese and Pauly, 2014). In  
343 fact, field surveys conducted in the Indo-Pacific and Caribbean found that reef crests were  
344 typically numerically dominated by members of this clade (Bellwood et al. 2002). Since each  
345 facultative cleaner wrasse in our study overlaps in habitat with other *Thalassoma* (in addition to  
346 other wrasses), juveniles of each of these species compete for prey directly with saturated  
347 assemblages of adult conspecifics and congeners. Geange et al. (2013) show that even among  
348 juvenile non-cleaner taxa in this clade, intense asymmetric competition between congeners can  
349 result within areas of high densities. Our results suggest that cleaning behavior may present a  
350 mechanism by which such competition is reduced by providing juvenile facultative cleaner  
351 species an alternate source of prey. Through ontogeny, these facultative cleaner fishes exhibit an  
352 allometric increase in vertical gape distance, bite force, and a heavier reliance on the forceful  
353 movement of the jaws, which together possibly obviate the need to continue cleaning.

## 354 **Methods**

### 355 *Specimen acquisition*

356 We collected an ontogenetic series for 11 wrasse species, all members of the *Thalassoma* clade  
357 (Fig. 3). We borrowed specimens from museums (see Table S6 for accession numbers, see  
358 supplementary materials), but for two species, *Gomphosus varius* and *Thalassoma bifasciatum*,  
359 we purchased additional live specimens from fish wholesalers to assemble their complete  
360 ontogenetic series. We euthanized live specimens via an overdose of MS-222 (IACUC protocol  
361 1006) and fixed them in 10% buffered formalin for 10-14 days before transferring them to 70%  
362 ethanol for short-term storage.

363  
364 Each ontogenetic series included a size range of individuals that encompassed small juvenile  
365 sizes (~40 mm standard length) through the adult common length (or maximum length) reported  
366 for the species on FishBase (Froese and Pauly, 2014). We recorded whether each specimen

367 exhibited a juvenile or an adult color pattern (regardless of sexual dimorphism in color) by  
368 referencing specimens with guidebooks (Burgess et al., 1991; Randall et al., 1997; Myers, 1999).  
369 We performed an extensive literature search to gather dietary information for each species and to  
370 determine which species are known to clean as juveniles. We found that across the species, the  
371 adult diet is generally similar and includes a variety of benthic crustaceans. Only in the case of *T.*  
372 *amblycephalum* did we observe a distinct feeding strategy: zooplanktivory. Information for all  
373 species is available in Table S1 (see supplementary material).

#### 374 *Using body length to determine the effects of size*

375 To assess how morphological and functional traits change with increasing body size, we adopted  
376 a metric of size that was applicable to all species. Because of the extreme elongation of the jaws  
377 in *G. varius*, a trait which itself changes over ontogeny (Myers, 1999), standard length was not a  
378 universally applicable metric of size. Instead, we computed ‘body length’ by subtracting head  
379 length (defined here as the linear distance from the tip of the snout to the posterior edge of the  
380 operculum) from standard length. We took measurements to the nearest 0.01 mm using digital  
381 calipers.

#### 382 *Bite force estimation*

383 We dissected each section of the adductor mandibulae from one side of each specimen. In  
384 wrasses, the adductor mandibulae complex originates broadly from the lateral surface of the  
385 suspensorium and inserts via tendons on the maxilla and articular bones (Winterbottom, 1974).  
386 This muscle complex is responsible for generating the force that powers the closing of the jaws  
387 during biting. Jaw closing in this muscle complex is accomplished via three subdivisions: A1,  
388 A2, and A3 (Fig. 4A). The A1 subdivision, which inserts on the maxilla, functions as part of the  
389 upper jaw protrusion mechanism. Following Westneat (2003), we did not include the A1 in our  
390 bite force model to focus on the major jaw closers: A2 and A3. Although we removed each of  
391 the three subdivisions, we only weighed the A2 and A3 subdivisions to the nearest 0.001 g using  
392 a Secura 213-1S precision balance (Sartorius Stedim Biotech GmbH, Germany).

393

394 Following muscle dissections, we cleared and double-stained specimens for bone and cartilage  
395 following Dingerkus and Uhler (1977). We then took 12 linear measurements of the skull for use

396 with the application MandibLever 3.3 (Westneat, 2003); see Fig. 4B for measurement  
397 definitions. We collected all linear measurements using an ocular micrometer attached to a Leica  
398 M80 light microscope (Leica Microsystems GmbH, Wetzlar, Germany). MandibLever 3.3  
399 creates a model of the lower jaw of fishes and uses musculoskeletal data to predict force  
400 transmission across the system. We used MandibLever 3.3 to estimate the total bite force (in  
401 newtons) for each specimen in this study, thus enabling us to compare the ontogenetic transitions  
402 in bite force across species.

#### 403 *Kinematic transmission coefficient (KT) and morphological traits*

404 In wrasses, a four-bar linkage system in the anterior jaws guides the rotation of the maxilla and  
405 the protrusion of the premaxilla as the mandible is depressed (Westneat, 1990). The kinematic  
406 transmission coefficient (KT) for this linkage system relates the amount of maxillary rotation  
407 produced by a given amount of lower jaw rotation. This ratio is analogous to the inverse of the  
408 mechanical advantage of simple lever systems. We characterized the linkage mechanics of the  
409 anterior-jaw four-bar linkage system (Fig. 4C-D) following methods used by Wainwright et al.  
410 (2004). As shown in Figs. 4C-D, the fixed link (f) is defined as the distance between the  
411 quadrate-articular joint and the proximal base of the nasal bone. The coupler link (c) is the  
412 distance from the proximal base of the nasal to the distal end of the nasal. The output link (o) is  
413 the distance from the distal end of the nasal to the confluence between the distal end of the  
414 alveolar arm of the premaxilla, the distal arm of the maxilla and the coronoid process of the  
415 mandible. The input link (i) is thus the distance between the latter point and the quadrate–  
416 articular joint. Depression of the mandible and rotation of the maxilla protrude the premaxilla  
417 (Fig. 4D).

418 We calculated the maxillary KT as the ratio between the degrees of maxillary rotation and the  
419 degrees of lower jaw rotation for each specimen (Westneat, 1990). Because of the nature of this  
420 ratio, maxillary KT is dimensionless. To maintain consistency across all specimens, we  
421 measured all starting angles with the jaws closed. We then rotated the lower jaw into a fully  
422 depressed position to quantify the changes in the angles associated with the input and output to  
423 the four-bar system.

424 In addition to maxillary KT, we measured jaw protrusion distance and vertical gape distance.  
425 Jaw protrusion distance is the excursion distance of the most anterior canine tooth on the



426 premaxilla as the upper jaw travels rostrally when the lower jaw is depressed. Vertical gape  
427 distance is the distance between each of the most anterior canine teeth on the upper and lower  
428 jaws when the mouth was fully open. For each of these measurements, we rotated the lower jaw  
429 into a fully depressed position without forcing it beyond natural extension. Measurements were  
430 recorded to the nearest 0.01 mm using the program ImageJ 1.47 (Rasband, 2014).

#### 431 *Allometry of traits*

432 We performed all statistical analyses in R 3.0.0 (R Development Core Team, 2013). To  
433 determine the scaling pattern of traits for each species, we performed a Standardized Major Axis  
434 (SMA) regression between the  $\log_{10}$  trait value (except in the case of maxillary KT, for which we  
435 used raw values) and  $\log_{10}$  body length using the *smatr* package (Warton et al., 2012) in R. We  
436 then compared these regression slopes with null predictions based on isometric scaling (for ratios  
437 = 0.0; linear distances = 1.0; areas and forces = 2.0). Here, we used modified *t*-tests to determine  
438 whether the observed slopes deviated significantly from the null predictions, which are based on  
439 Euclidean geometry (Hill, 1950; Schmidt-Nielson, 1984; Emerson and Bramble, 1993; Pfaller et  
440 al., 2011). We considered deviations from isometry to be significant if the predicted slopes fell  
441 outside the 95% confidence intervals of the slopes we observed. We interpreted positive or  
442 negative deviations from isometry in these regression slopes as positive or negative allometry,  
443 respectively.

444  
445 Lastly, we analyzed the ontogeny of the mechanical advantage of each muscle subdivision-  
446 specific lever system. To avoid the bias of such ratios in analysis (Packard and Boardman, 1988),  
447 we computed the residuals from a linear regression of each  $\log_{10}$  in-lever (dependent variable)  
448 against the  $\log_{10}$  out-lever (covariate) in an ANalysis of COVAriance (ANCOVA), using species  
449 as the independent variable. We then used each set of residuals in subsequent analyses. These are  
450 hereafter referred to as the residual mechanical advantage of the A2 and the A3, respectively.

#### 451 *Testing for phylogenetic signal*

452 For each trait, we used the SMA regression slope between the  $\log_{10}$  trait value (except in the case  
453 of maxillary KT, for which we used raw values) and  $\log_{10}$  body length (outlined above). We then  
454 tested for phylogenetic signal in the slopes, treating the slope of each regression as its respective



455 species' trait value. We estimated Pagel's lambda (Pagel, 1999) and Blomberg's K (Blomberg et  
456 al., 2003) using the package *phytools* (Revell, 2012) in R, and we tested the hypothesis that the  
457 phylogenetic signal was greater than 0. The phylogenetic tree we used, which contained all  
458 species in this study, was pruned from Kazancioglu et al. (2009), who used a supermatrix  
459 approach to propose relationships between 252 labrid species. For all traits, we found the level of  
460 phylogenetic signal to be extremely low, and we were unable to reject the null hypothesis that  
461 phylogenetic signal equals 0 (Table S13, see supplementary materials). This implies that the  
462 ontogenetic trajectories in the traits we analyzed have been under such strong selection, that the  
463 trends in slopes do not follow a Brownian motion model of evolution. While we cannot rule out  
464 that the lack of phylogenetic signal may be due to limited power, we were unable to detect  
465 phylogenetic signal in any of the traits we analyzed. Therefore, all subsequent analyses were  
466 performed using traditional parametric statistical methods.

#### 467 *Comparisons between facultative cleaners and non-cleaners*

468 To evaluate the relationship between each trait and body length across groups of species, we first  
469 tested for homogeneity of slopes by building separate General Linear Models (GLMs), specific  
470 to each trait. In each case, the dependent variable was the  $\log_{10}$  trait value (except in the case of  
471 maxillary KT, for which we used raw values), species identity was the independent variable, and  
472  $\log_{10}$  body length was used as a covariate. We tested the hypothesis that interactions between the  
473 independent variable (species) and the covariates ( $\log_{10}$  body length) were significantly different  
474 from 0. In every case, we found highly significant interactions, indicating that in each analysis,  
475 the species-specific slopes were not homogeneous. As this violates a key assumption of  
476 ANCOVA, we refrained from comparing least squares means across species.

477  
478 To test the hypothesis that facultative cleaners exhibit more extreme allometry in functional traits  
479 compared to non-cleaners, we performed a series of trait-specific two-sample t-tests. For each  
480 trait, we assessed the equality of the mean of the SMA regression slopes for the facultative  
481 cleaners against that of the non-cleaners. Here, the null hypothesis was that the mean SMA  
482 regression slope would not differ between the two groups. We applied a Šidák correction to  
483 reduce the Type I error probability across multiple comparisons (Šidák, 1967).

484

485 To identify the morphological correlates of cleaning, we made comparisons of trait magnitudes  
486 between facultative cleaners and non-cleaners across the range of body lengths. Given the  
487 heterogeneity of slopes, we employed the Wilcoxon procedure (Wilcoxon, 1987) to determine regions  
488 of the x-axis ( $\log_{10}$  body length in all cases) in which trait values for non-cleaners were  
489 significantly different from those of facultative cleaners. This allowed us to distinguish at what  
490 body lengths the differences in trait magnitudes seen between facultative and non-cleaner species  
491 were no longer significantly different, given the error structures of the regressions. We decided  
492 to adopt this approach rather than use *t*-tests to compare regression intercepts because such  
493 intercepts represent trait values at a body size of zero, and thus do not constitute trait values that  
494 are biologically realistic. The Wilcoxon procedure is a modification of the Johnson-Neyman  
495 method (Johnson and Neyman, 1936) that is adjusted for multiple comparisons. For each trait,  
496 we compared the regression line of every non-cleaner species ( $n=6$ ) with that of each facultative  
497 cleaner species ( $n=5$ ), for a total of 30 comparisons per trait. The Wilcoxon procedure allowed us to  
498 identify the regions where the data in each pairwise comparison begin to overlap, taking into  
499 account the spread of data around each regression line. In several cases, regression lines crossed  
500 at values of  $x$  that represented biologically-impossible body lengths for either or both of the  
501 species involved. We therefore restricted values of  $x$  to those that were covered within our  
502 dataset.

503

#### 504 *Investigating trends in bite force*

505 To understand the factors that determine the ontogeny of bite force in each species, we ran  
506 separate, species-specific multiple regression analyses. In each analysis, we used the  $\log_{10}$  bite  
507 force as calculated by MandibLever 3.3 as the dependent variable. For the independent variables,  
508 we used: the residual mechanical advantage values of the A2 and A3, the  $\log_{10}$  fiber lengths of  
509 the A2 and A3, and the  $\log_{10}$  masses of the A2 and A3. We selected these variables because  
510 MandibLever 3.3 computes muscle cross-sectional area as muscle mass divided by muscle fiber  
511 length times muscle density (Westneat, 2003), and assumes a constant muscle density for all  
512 specimens (McMahon, 1984). Our measurement of muscle fiber length follows that of Westneat  
513 (2003). Both mass and fiber length were included as predictors because force generated by a  
514 muscle is proportional to the muscle's cross-sectional area (Powell et al., 1984).

515

516 We then used the R package *relaimpo* (Grömping, 2006) to calculate the  $R^2$  decomposition of  
517 each model according to Zuber and Strimmer (2010). This method computes Correlation-  
518 Adjusted coRrelation (CAR) scores, which are the correlations between the response and the  
519 Mahalanobis-decorrelated predictors. Comparing these scores allowed us to assess the relative  
520 importance of each predictor, and enabled us to identify which variable most strongly predicted  
521 each species' ontogenetic bite force trajectory. We then used Multiple Analysis Of VAriance  
522 (MANOVA) to assess whether facultative cleaners exhibited significant differences in the CAR  
523 scores of all six variables when compared to non-cleaners.

524

525

## 526 **List of Symbols and Abbreviations**

### 527 *Museums*

528 CAS California Academy of Sciences

529 LACM Los Angeles County Museum of Natural History

530 USNM Smithsonian National Museum of Natural History

531 VB Vikram Baliga's personal collection

### 532 *Mechanics*

533 KT kinematic transmission coefficient

534 f fixed link, in anterior-jaw four-bar linkage system

535 c coupler link, in anterior-jaw four-bar linkage system

536 i input link, in anterior-jaw four-bar linkage system

537 o output link, in anterior-jaw four-bar linkage system

### 538 *Statistics*

539 s.d. standard deviation

540  $R^2$  coefficient of determination  
541 SMA standardized major axis regression  
542 ANCOVA analysis of covariance  
543 MANOVA multiple analysis of variance  
544  $t$  t-value; subscript denotes degrees of freedom  
545 *Allometry* (in Appendix only)  
546 I isometry  
547 - negative allometry  
548 + positive allometry

## 550 **Acknowledgements**

551 We would like to thank collections managers Jeffrey T. Williams (USNM), Rick Feeney  
552 (LACM), and David Catania (CAS) for their invaluable help in approving and processing  
553 specimen loans. We thank Benjamin A. Higgins, Christopher J. Law, and Sarah Kienle for  
554 valuable comments on the manuscript. Christopher J. Law prepared the illustrations shown in  
555 Fig. 1 from photographs of specimens. David C. Collar and Peter T. Raimondi provided critical  
556 advice towards our statistical analyses. Finally, we thank undergraduate research assistants  
557 Michellé Mac, Michaela Tondi, Brandon Parks, Kathryn Pelon, and Danielle Pruitt for their  
558 assistance in processing and clearing and staining specimens.

559

## 560 **Funding**

561 This work was supported by the Society for the Study of Evolution's Rosemary Grant Award for  
562 Graduate Student Research, awarded to V.B.B.

563

564 **Author Contributions**

565 V.B.B. collected all specimens and data, performed all data analyses, and prepared the  
566 manuscript. R.S.M. helped develop the approach, provided crucial insights, and edited the  
567 manuscript.

568

569 **Author Competing Interests**

570 The authors have no competing interests to declare.

571

572 **References**

573 **Bellwood, D. R., Wainwright, P. C., Fulton, C. J., and Hoey, A. S.** (2006). Functional  
574 versatility supports coral reef biodiversity. *Proc. R. Soc. B.* **273**(1582), 101–107.

575

576 **Blomberg, S. P., Garland Jr., T., and Ives, A. R.** (2003). Testing for phylogenetic signal in  
577 comparative data: Behavioral traits are more labile. *Evolution* **57**, 717 -745.

578

579 **Bronstein, J. L.** (1994). Conditional outcomes in mutualistic interactions. *Trends Ecol. Evolut.*  
580 **9**(6), 214–217.

581

582 **Bshary, R., and Grutter, A. S.,** (2002). Asymmetric cheating opportunities and partner control  
583 in the cleaner fish mutualism. *Animal Behaviour.* **63**, 547-555.

584

585 **Bshary, R., and Grutter, A. S.,** (2005). Punishment and partner switching cause cooperative  
586 behaviour in a cleaning mutualism. *Bio. Lett.* **1**, 396-399.

587

588 **Bshary, R., and Grutter, A. S.,** (2006). Image scoring and cooperation in a cleaner fish  
589 mutualism. *Nature* **441**, 975-978.

590

- 591 **Burgess, W. E., Axelrod, H. R., and Hunziker, R.** (1991). *Atlas of Marine Aquarium Fishes*.  
592 Neptune City, NJ: T.F.H. Publications, Inc.  
593
- 594 **Coté, I.M.** (2000). Evolution and Ecology of Cleaning Symbioses in the Sea. *Oceanograph. Mar*  
595 *Biol: Ann. Rev.* **38**, 311–355.  
596
- 597 **Darcy G. H., Maisel E., and Ogden T. C.** (1974). Cleaning preferences of the gobies  
598 *Gobiossoma evelynae* and *G. prochilos* and the juvenile wrasse *Thalassoma bifasciatum*. *Copeia*  
599 **1974**, 375–379.  
600
- 601 **Davies, A. J.** (1981) A scanning electron microscope study of the praniza larva of *Gnathia*  
602 *maxillaris* Montagu (Crustacea, Isopoda, Gnathiidae), with special reference to the mouthparts.  
603 *J. Natl. Hist.* **15**, 545-551  
604
- 605 **Deban, S.M. and O'Reilly, J.C.** (2005). The ontogeny of feeding kinematics in a giant  
606 salamander *Cryptobranchus alleganiensis*: Does current function or phylogenetic relatedness  
607 predict the scaling patterns of movement? *Zoology* **108**,155-167.  
608
- 609 **Dingerkus G, Uhler LD.** (1977). Enzyme clearing of alcian blue stained whole small vertebrates  
610 for demonstration of cartilage. *Stain Technol.* **52**, 229–232.  
611
- 612 **Emerson, S. B. and Bramble, D. M.** (1993). Scaling, allometry, and skull design. In *The Skull*,  
613 *Vol. 3, Functional and Evolutionary Mechanisms* (ed. J. Hanken and B. K.Hall), pp. 384-421.  
614 Chicago: University of Chicago Press.  
615
- 616 **Ferry-Graham, L. A., Gibb, A. C., and Hernandez, L. P.** (2008). Premaxillary movements in  
617 cyprinodontiform fishes: An unusual protrusion mechanism facilitates “picking” prey capture.  
618 *Zoology* **111**, 455-466.  
619
- 620 **Frédérich, B., and Sheets, H.D.** (2009). Evolution of ontogenetic allometry shaping giant  
621 species: a case study from the damselfish genus *Daschyllus* (Pomacentridae). *Bio. J. Linn. Soc.*  
622 *Lond.* **99**, 99-117.

623

624 **Froese, R. and Pauly, D.** Editors. (2014). FishBase. World Wide Web electronic publication.  
625 www.fishbase.org, version (1/2014).

626

627 **Geange, S.W.** (2010). Effects of larger heterospecifics and structural refuge on the survival of a  
628 coral reef fish, *Thalassoma hardwicke*. *Mar. Ecol. Prog. Ser.* **407**, 197–207

629

630 **Geange, S.W., Stier, A.C., Shima, J.S.** (2013). Competitive hierarchies among three species of  
631 juvenile coral reef fishes. *Mar. Ecol. Prog. Ser.* **472**, 239–248

632

633 **Gorlick, D. L.** (1980). Ingestion of host fish surface mucus by the Hawaiian cleaning wrasse,  
634 *Labroides phthirophagus* (Labridae), and its effect on host species preference. *Copeia* **1980**,  
635 863–868

636

637 **Grömping, U.** (2006). Relative Importance for Linear Regression in R: The Package *relaimpo*.  
638 *J. Stat. Soft.* **17**(1), 1-27.

639

640 **Grueter, A. S.** (1996). Parasite removal rates by the cleaner wrasse *Labroides dimidiatus*. *Mar.*  
641 *Ecol. Prog. Ser.* **130**, 61-70.

642

643 **Grueter, A. S.** (1997). Size-selective predation by the cleaner fish *Labroides dimidiatus*. *J. Fish*  
644 *Bio.* **50**, 1303-1308.

645

646 **Grueter, A. S., and Bshary, R.** (2003). Cleaner fish prefer client mucus: support for partner  
647 control mechanisms in cleaning interactions. *Proc. R. Soc. B., Bio. Letters.* **270**, Supp. 2. S242-  
648 S244.

649

650 **Grueter, A. S., and Bshary, R.** (2004). Cleaner fish *Labroides dimidiatus* diet preferences for  
651 different types of mucus and parasitic gnathiid isopods. *Animal Behaviour.* **68**, 583-588.

652

- 653 **Hernandez, L. P., Ferry-Graham, L. A., and Gibb, A. C.** (2008). Morphology of a picky  
654 eater: A novel mechanism underlies premaxillary protrusion and retraction within  
655 cyprinodontiforms. *Zoology* **111**, 442-454.
- 656
- 657 **Hernandez, L. P., Gibb, A. C., and Ferry-Graham, L. A.** (2009). Trophic Apparatus in  
658 Cyprinodontform Fishes: Functional Specializations for Picking and Scraping Behaviors. *J.*  
659 *Morph.* **270**, 645-661.
- 660
- 661 **Herrel, A. and Gibb, A. C.** (2006). Ontogeny of performance in vertebrates. *Physiol. Biochem.*  
662 *Zool.* **79**, 1-6.
- 663 **Herrel, A. and O'Reilly, J. C.** (2006). Ontogenetic scaling of bite force in lizards and turtles.  
664 *Physiol. Biochem. Zool.* **79**, 31-42.
- 665
- 666 **Hill, A. V.** (1950). The dimensions of animals and muscular dynamics. *Sci. Prog.* **38**, 209-230.
- 667
- 668 **Hobson, E. S.** (1969). Comments on Certain Recent Generalizations Regarding Cleaning  
669 Symbioses in Fishes. *Pacific Science* **23**, 35-39.
- 670
- 671 **Hobson, E. S.** (1971). Cleaning symbioses among California inshore fishes. *Fish. Bull.* **69**(3),  
672 491-523.
- 673
- 674 **Horn, M. H., and Ferry-Graham, L.A.** (2006). Feeding Mechanisms and Trophic Interactions.  
675 In *The Ecology of Marine Fishes: California and Adjacent Waters* (eds. L.G. Allen, D. J.  
676 Pondella, and M.H. Horn), pp. 397-410. Berkeley: University of California Press.
- 677
- 678 **Hulsey, C. D., and Wainwright, P. C.** (2002). Projecting mechanics into morphospace:  
679 disparity in the feeding system of labrid fishes. *Proc. R. Soc. B.* **269**(1488), 317–326.
- 680
- 681 **Johnson, P. O., and Neyman, J.** (1936). Tests of certain linear hypotheses and their application  
682 to some educational problems. In *Statistical Research Memoirs* (eds. J. Neyman and E.S.  
683 Pearson), **1**, 57-93.



- 684  
685 **Johnstone, R. A., and Bshary, R.** (2002). From parasitism to mutualism: partner control in  
686 asymmetric interactions. *Ecol. Lett.* **5**, 634–639.
- 687  
688 **Kazancioglu, E., Near, T. J., Hanel, R., and Wainwright, P. C.** (2009). Influence of sexual  
689 selection and feeding functional morphology on diversification rate of parrotfishes (Scaridae).  
690 *Proc. R. Soc. B.* **276**(1672), 3439–3446.
- 691  
692 **Leim, K. F.** (1979). Modulatory multiplicity in the feeding mechanism in cichlid fishes, as  
693 exemplified by the invertebrate pickers of Lake Tanganyika. *J. Zool., Lond.* **189**, 93-125.
- 694  
695 **Losey, G. S.** (1972). The Ecological Importance of Cleaning Symbiosis. *Copeia* **1972**(4), 820–  
696 833.
- 697  
698 **Losey, G. S.** (1974). Cleaning Symbiosis in Puerto Rico with Comparison to the Tropical Pacific  
699 *Copeia* **1974**(4), 960–970.
- 700  
701 **Losey, G. S., Balazs, G. H., and Privitera, L. A.** (1994). Cleaning Symbiosis between the  
702 Wrasse, *Thalassoma duperrey*, and the Green Turtle, *Chelonia mydas*. *Copeia* (**3**), 684–690.
- 703  
704 **McMahon, T. A.** (1984). *Muscles, Reflexes, and Locomotion*. Princeton: Princeton University  
705 Press.
- 706  
707 **Mitteroecker, P., Gunz, P., Bernhard, M., Shaefer, K., and Bookstein, F. L.** (2004).  
708 Comparison of cranial ontogenetic trajectories among great apes and humans. *J. Hum. Evol.*  
709 **46**(2004), 679-698.
- 710  
711 **Myers, R. F.**, (1999). *Micronesian reef fishes: a comprehensive guide to the coral reef fishes of*  
712 *Micronesia*, 3rd revised and expanded edition. Coral Graphics, Barrigada, Guam.
- 713

- 714 **Packard, G. C. and Boardman, T. J.** (1988). The misuse of ratios, indices, and percentages in  
715 ecophysiological research. *Physiol. Zool.* **61**, 1–9.
- 716
- 717 **Pagel, M.** (1999). Inferring the historical patterns of biological evolution. *Nature* **401**(6756),  
718 877–84.
- 719
- 720 **Pfaller, J. B., Gignac, P. M., and Erickson, G. M.** (2011). Ontogenetic changes in jaw-muscle  
721 architecture facilitate durophagy in the turtle *Sternotherus minor*. *J. Exp. Biol.* **214**(Pt 10), 1655–  
722 1667.
- 723
- 724 **Powell, P. L., Roy, R. R., Kanim, P., Bello, M., Edgerton, V. R.** (1984). Predictability of  
725 skeletal muscle tension from architectural determinations in guinea pig hind limbs. *J. Appl.*  
726 *Physiol.* **57**, 1715–1721
- 727
- 728 **Poulin, R. and Grutter, A. S.**, (1996). Proximate Symbioses□: Cleaning and Adaptive  
729 Explanation. *BioScience* **46**(7), 512–517.
- 730
- 731 **R Development Core Team.** (2013). R: A language and environment for statistical computing.  
732 Vienna, Austria: R Foundation for Statistical Computing. <http://www.R-project.org>.
- 733
- 734 **Randall, J. E., Allen, G. R. and Steene, R. C.** (1997). *Fishes of the Great Barrier Reef and*  
735 *Coral Sea*. Crawford House Publishing, Bathurst, Australia.
- 736
- 737 **Rasband, W. S.**, (2014). ImageJ, U. S. National Institutes of Health, Bethesda, Maryland, USA,  
738 <http://imagej.nih.gov/ij/>, 1997–2014.
- 739
- 740 **Richard, B.A. and Wainwright, P.C.** (1995). Scaling the feeding mechanism of largemouth  
741 bass (*Micropterus salmoides*): kinematics of prey capture. *J. Exp. Biol.*, **198**, 419–433.
- 742

- 743 **Revell, L. J.** (2012). phytools: An R package for phylogenetic comparative biology (and other  
744 things). *Methods Ecol. Evol.* **3**, 217-223.
- 745
- 746 **Schmidt-Nielson, K.** (1984). *Scaling: Why is Animal Size so Important?* Cambridge: Cambridge  
747 University Press.
- 748
- 749 **Šidák, Z. K.** (1967). "Rectangular Confidence Regions for the Means of Multivariate Normal  
750 Distributions". *J. Am. Stat. Assoc.* **62**(318), 626–633.
- 751
- 752 **Soares, M. C., Bshary, R., and Côté, I. M.,** (2009). Cleaning in pairs enhances honest in male  
753 cleaning gobies. *Behavioral Ecol.* **20**, 1343-1347.
- 754
- 755 **Soares, M. C., Côté, I. M., Cardoso, S. C., Oliveria, R. F., and Bshary, R.** (2010). Caribbean  
756 cleaning gobies prefer client ectoparasites over mucus. *Ethology*, **116**, 1244-1248.
- 757
- 758 **Wainwright, P. C., Bellwood, D. R., Westneat, M. W., Grubich, J. R., and Hoey, A. S.**  
759 (2004). A functional morphospace for the skull of labrid fishes: patterns of diversity in a  
760 complex biomechanical system. *Bio. J. Linn. Soc. Lond.* **82**(1), 1–25.
- 761
- 762 **Warton D. I., Duursma R. A., Falster D. S., and Taskinen, S.** (2012). smatr - an R package  
763 for estimation and inference about allometric lines. *Methods Ecol. Evol.* **3**, 257–259.
- 764
- 765 **Westneat, M. W.** (1990). Feeding mechanics of teleost fishes (Labridae; Perciformes): A test of  
766 four-bar linkage models. *J. Morph.* **205**(3), 269–295.
- 767
- 768 **Westneat, M. W.** (1994). Transmission of force and velocity in the feeding mechanisms of  
769 labrid fishes (Teleostei, Perciformes). *Zoomorphol.* **114**(2), 103–118.
- 770
- 771 **Westneat, M. W.** (1995). Feeding, Function, and Phylogeny: Analysis of Historical  
772 Biomechanics in Labrid Fishes Using Comparative Methods. *Syst. Biol.* **44**(3), 361-383.
- 773

774 **Westneat, M. W.** (2003). A biomechanical model for analysis of muscle force, power output  
775 and lower jaw motion in fishes. *J. Theor. Biol.* **223**(3), 269–281.

776  
777 **Wicksten, M. K.** (1998). Behaviour of cleaners and their client fishes at Bonaire, Netherlands  
778 Antilles. *J. Nat. Hist.* **32**(1), 13–30.

779  
780 **Wilcox, R. R.** (1987). *New Statistical Procedures for the Social Sciences: Modern Solutions to*  
781 *Basic Problems.* Hillsdale, New Jersey: Erlbaum.

782  
783 **Wilson, L. A. B., and Sanchez-Villagra, M. R.** (2010). Diversity trends and their ontogenetic  
784 basis: an exploration of allometric disparity in rodents. *Proc. R. Soc. B.* **277**, 1227-1234.

785  
786 **Winterbottom, R.,** (1974). A descriptive synonymy of the striated muscles of the Teleostei.  
787 *Proc. Natl. Acad. Sci. Phil.* **125**, 225–317.

788  
789 **Zuber, V. and Strimmer, K.** (2011). "High-Dimensional Regression and Variable Selection  
790 Using CAR Scores," *Stat. App. Gen. Mol. Biol.* **10**(1), 34.

791  
792  
793  
794  
795  
796  
797  
798  
799  
800

801 **Figure Captions**

802 **Fig. 1. Scaling of functional traits in all 11 species.** The following traits are shown plotted  
 803 against  $\log_{10}$  Body Length: (A)  $\log_{10}$  Vertical Gape Distance, (B)  $\log_{10}$  Premaxillary Protrusion  
 804 Distance, (C)  $\log_{10}$  Total Bite Force (as estimated by MandibLever 3.3), and (D) Maxillary KT.  
 805 Solid, orange lines indicate regressions for facultative cleaner fishes; blue dashed lines indicate  
 806 regressions for non-cleaner fishes. Vertical grey lines indicate mean and standard deviation of  
 807 critical x-values indicated by the Wilcox procedure for all comparisons.

808 **Fig. 2. Scaling of muscle sizes and mechanical advantage in all 11 species.** The following  
 809 traits are shown plotted against  $\log_{10}$  Body Length: (A) Residual Mechanical Advantage of the  
 810 A2 Muscle, (B) Residual Mechanical Advantage of the A3 Muscle, (C)  $\log_{10}$  A2 Mass, (D)  $\log_{10}$   
 811 A3 Mass, (E)  $\log_{10}$  A2 Fiber Length, and (F)  $\log_{10}$  A3 Fiber Length. Solid, orange lines indicate  
 812 regressions for facultative cleaner fishes; blue dashed lines indicate regressions for non-cleaner  
 813 fishes.

814 **Fig. 3. Relationships between the 11 wrasses analyzed in this study.** Highlighted species are  
 815 reported to be facultative cleaner fishes as juveniles (Table S1, see supplementary materials).  
 816 The phylogeny is taken from Kazancioglu et al. 2009, who used a supermatrix approach for 252  
 817 species of labrids. The tree is pruned to include only the species in this study. The illustration for  
 818 each species depicts juvenile female morphology and coloration pattern.

819 **Fig. 4. Cranial morphology of *Thalassoma lucasanum*.** (A) Three subdivisions of the adductor  
 820 mandibulae complex. The A1 has been detached from its origin on the preopercle and moved in  
 821 order to show the position of the A3, which is medial to the A1. (B) Morphometric  
 822 measurements used in MandibLever 3.3. All 12 measurement definitions and line colors follow  
 823 Westneat (2003): 1, 2, and 3 are the inlever lengths of A2, A3, and jaw opening, respectively; 4  
 824 is the outlever length; 5 is the length of the A2; 6 is the length of the A3; 7 is the A3 tendon  
 825 length; 8 and 9 are distances from each muscle subdivision's origin to the jaw joint; 10 is the  
 826 distance between the A2 and the A3 insertion points; 11 is the distance from the tip of the jaw to  
 827 the A2 subdivision insertion; 12 is the length between the tip of opening inlever to the tip of jaw.  
 828 (C-D) Four-bar linkage system in closed and open positions, respectively. *Abbreviations:* art,

829 articular; dt, dentary; mx, maxilla; pmx, premaxilla; pop, preopercle; f, fixed link; c, coupler  
830 link; o, output link, i, input link. All scale bars are 5 mm.

831

## 832 **Table Captions**

833 **Table 1: Comparison of the mean slopes between facultative cleaners and non-cleaners in**  
834 **feeding traits.** The trait listed in each row indicates the dependent variable used in species-  
835 specific SMA regressions against  $\log_{10}$  Body Length. The regression slopes were then pooled  
836 according to dietary category. *P*-values are adjusted according to a Šidák correction. Bold rows  
837 indicate significant differences in mean slopes between facultative cleaners and non-cleaners.

838 **Table 2: Determining regression line overlap between facultative cleaners and non-**  
839 **cleaners.** The cells listed under each trait display the  $\log_{10}$  body length at which the regression  
840 lines of the listed facultative cleaner and non-cleaner species began to overlap. Cells without  
841 values (indicated by the dashes) indicated cases where regression lines crossed at values that  
842 represented biologically-impossible body lengths for either or both of the species involved.

843 **Table 3: Multiple regression analyses reveal the traits that contribute the most to bite**  
844 **force.** <sup>a</sup> Correlation-Adjusted coRrelation (CAR) scores, following Zuber and Strimmer (2010).  
845 Bold values indicate the trait with the largest CAR score. <sup>b</sup> Calculated from a linear regression of  
846 each  $\log_{10}$  in-lever (dependent variable) against the  $\log_{10}$  out-lever (covariate) in an analysis of  
847 covariance (ANCOVA), using species as the independent variable.

**Table 1: Comparison of the mean slopes between facultative cleaners and non-cleaners in feeding traits**

| Trait                                              | Mean Difference | <i>t</i> -value | d.f.     | <i>p</i> -value |
|----------------------------------------------------|-----------------|-----------------|----------|-----------------|
| <b>log<sub>10</sub> Vertical Gape Distance</b>     | <b>0.54</b>     | <b>4.11</b>     | <b>9</b> | <b>0.010</b>    |
| log <sub>10</sub> Premaxillary Protrusion Distance | 0.43            | 1.39            | 9        | 0.59            |
| <b>log<sub>10</sub> Bite Force</b>                 | <b>0.68</b>     | <b>2.66</b>     | <b>9</b> | <b>0.046</b>    |
| Maxillary KT                                       | 0.16            | 1.34            | 9        | 0.62            |
| Residual Mechanical Advantage of A2 Muscle         | 0.26            | 1.10            | 9        | 0.94            |
| Residual Mechanical Advantage of A3 Muscle         | 0.42            | 2.05            | 9        | 0.44            |
| log <sub>10</sub> A2 Mass                          | 0.38            | 1.10            | 9        | 0.88            |
| log <sub>10</sub> A3 Mass                          | 0.63            | 2.03            | 9        | 0.36            |
| log <sub>10</sub> A2 Fiber Length                  | 0.29            | 2.57            | 9        | 0.17            |
| log <sub>10</sub> A3 Fiber Length                  | 0.22            | 1.91            | 9        | 0.43            |

**Table 2: Determining regression line overlap between facultative cleaners and non-cleaners**

| Facultative Cleaner   | Non-Cleaner               | log <sub>10</sub> Bite Force | Maxillary KT | log <sub>10</sub> Vertical Gape Distance | log <sub>10</sub> Premaxillary Protrusion Distance |
|-----------------------|---------------------------|------------------------------|--------------|------------------------------------------|----------------------------------------------------|
| <i>T. bifasciatum</i> | <i>G. varius</i>          | --                           | --           | 1.88                                     | --                                                 |
|                       | <i>T. amblycephalum</i>   | --                           | --           | 1.64                                     | 1.91                                               |
|                       | <i>T. hardwicke</i>       | 1.82                         | 2.25         | 1.81                                     | --                                                 |
|                       | <i>T. hebraicum</i>       | --                           | --           | --                                       | --                                                 |
|                       | <i>T. quinquevittatum</i> | --                           | --           | 1.83                                     | --                                                 |
|                       | <i>T. rueppellii</i>      | --                           | --           | 1.84                                     | --                                                 |
| <i>T. duperrey</i>    | <i>G. varius</i>          | --                           | --           | --                                       | 1.80                                               |
|                       | <i>T. amblycephalum</i>   | --                           | 2.14         | 1.65                                     | --                                                 |
|                       | <i>T. hardwicke</i>       | 1.76                         | 2.11         | 1.88                                     | 1.86                                               |
|                       | <i>T. hebraicum</i>       | --                           | --           | --                                       | --                                                 |
|                       | <i>T. quinquevittatum</i> | --                           | --           | --                                       | --                                                 |
|                       | <i>T. rueppellii</i>      | --                           | --           | --                                       | 1.72                                               |

|                     |                           |      |      |      |      |
|---------------------|---------------------------|------|------|------|------|
| <i>T. lucasanum</i> | <i>G. varius</i>          | 1.61 | 2.13 | --   | --   |
|                     | <i>T. amblycephalum</i>   | --   | 1.85 | 1.85 | --   |
|                     | <i>T. hardwicke</i>       | 1.76 | 1.88 | --   | --   |
|                     | <i>T. hebraicum</i>       | 1.90 | 1.95 | --   | --   |
|                     | <i>T. quinquevittatum</i> | 1.88 | --   | --   | --   |
|                     | <i>T. rueppellii</i>      | 1.87 | 1.92 | --   | 1.96 |
| <i>T. lutescens</i> | <i>G. varius</i>          | --   | --   | 1.89 | 1.75 |
|                     | <i>T. amblycephalum</i>   | 1.81 | --   | 1.68 | --   |
|                     | <i>T. hardwicke</i>       | 1.71 | 2.19 | 1.84 | 1.77 |
|                     | <i>T. hebraicum</i>       | 1.82 | --   | --   | 1.65 |
|                     | <i>T. quinquevittatum</i> | 1.79 | --   | 1.86 | --   |
|                     | <i>T. rueppellii</i>      | 1.67 | --   | 1.87 | 1.71 |
| <i>T. pavo</i>      | <i>G. varius</i>          | 1.62 | --   | 1.85 | --   |
|                     | <i>T. amblycephalum</i>   | --   | 1.99 | 1.69 | --   |
|                     | <i>T. hardwicke</i>       | 1.83 | 1.99 | 1.81 | --   |
|                     | <i>T. hebraicum</i>       | --   | 2.14 | --   | --   |
|                     | <i>T. quinquevittatum</i> | --   | --   | 1.81 | --   |
|                     | <i>T. rueppellii</i>      | --   | 2.10 | 1.82 | --   |



**Table 3: Multiple regression analyses reveal the traits that contribute the most to bite force**

|                                 | CAR Scores <sup>a</sup>               |                                       |                           |                           |                                   |                                   | Adjusted R <sup>2</sup> | df (residual) | F-Ratio  | p-value  |
|---------------------------------|---------------------------------------|---------------------------------------|---------------------------|---------------------------|-----------------------------------|-----------------------------------|-------------------------|---------------|----------|----------|
|                                 | Residual MA of A2 Muscle <sup>b</sup> | Residual MA of A3 Muscle <sup>b</sup> | log <sub>10</sub> A2 Mass | log <sub>10</sub> A3 Mass | log <sub>10</sub> A2 Fiber Length | log <sub>10</sub> A3 Fiber Length |                         |               |          |          |
| <i>Gomphosus varius</i>         | 0.04                                  | 0.09                                  | <b>0.26</b>               | 0.24                      | 0.18                              | 0.19                              | 0.99                    | 10            | 374.68   | <0.00001 |
| <i>Thalassoma amblycephalum</i> | 0.07                                  | 0.10                                  | <b>0.27</b>               | 0.25                      | 0.15                              | 0.16                              | 0.99                    | 10            | 373.10   | <0.00001 |
| <i>T. bifasciatum</i>           | 0.10                                  | 0.00                                  | <b>0.29</b>               | 0.26                      | 0.15                              | 0.18                              | 0.99                    | 12            | 270.29   | <0.00001 |
| <i>T. duperrey</i>              | 0.15                                  | 0.06                                  | <b>0.26</b>               | 0.19                      | 0.20                              | 0.14                              | 0.98                    | 9             | 96.87    | <0.00001 |
| <i>T. hardwicke</i>             | 0.00                                  | 0.14                                  | 0.19                      | 0.22                      | 0.17                              | <b>0.28</b>                       | 0.93                    | 17            | 48.14    | <0.00001 |
| <i>T. hebraicum</i>             | 0.09                                  | 0.01                                  | 0.25                      | <b>0.26</b>               | 0.22                              | 0.17                              | 0.99                    | 13            | 2008.12  | <0.00001 |
| <i>T. lucasanum</i>             | 0.06                                  | 0.11                                  | 0.16                      | <b>0.28</b>               | 0.13                              | 0.25                              | 0.97                    | 11            | 72.56    | <0.00001 |
| <i>T. lutescens</i>             | 0.10                                  | 0.07                                  | <b>0.22</b>               | 0.20                      | 0.19                              | 0.21                              | 0.99                    | 11            | 175.30   | <0.00001 |
| <i>T. pavo</i>                  | 0.00                                  | 0.01                                  | 0.23                      | 0.24                      | 0.25                              | <b>0.28</b>                       | 0.99                    | 13            | 531.04   | <0.00001 |
| <i>T. quinquevittatum</i>       | 0.04                                  | 0.05                                  | 0.23                      | <b>0.33</b>               | 0.19                              | 0.16                              | 0.99                    | 8             | 335.26   | <0.00001 |
| <i>T. rueppellii</i>            | 0.19                                  | 0.06                                  | <b>0.27</b>               | 0.26                      | 0.13                              | 0.09                              | 0.99                    | 11            | 10664.11 | <0.00001 |

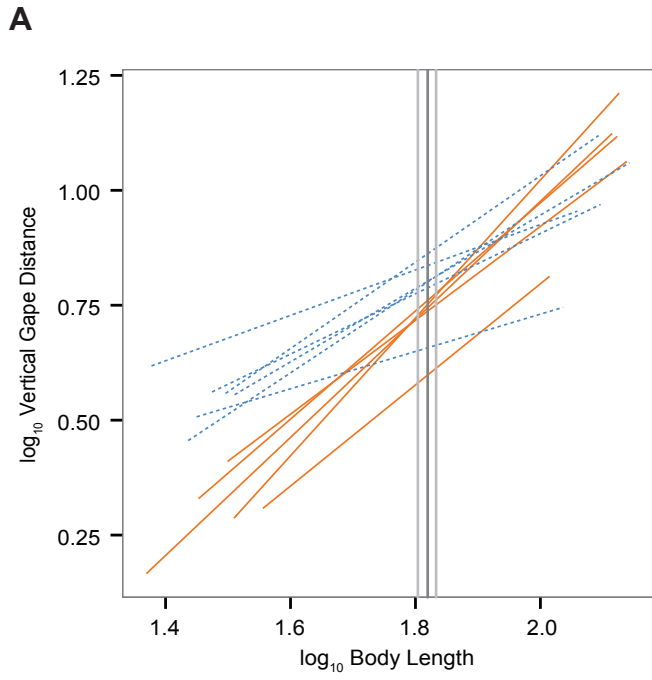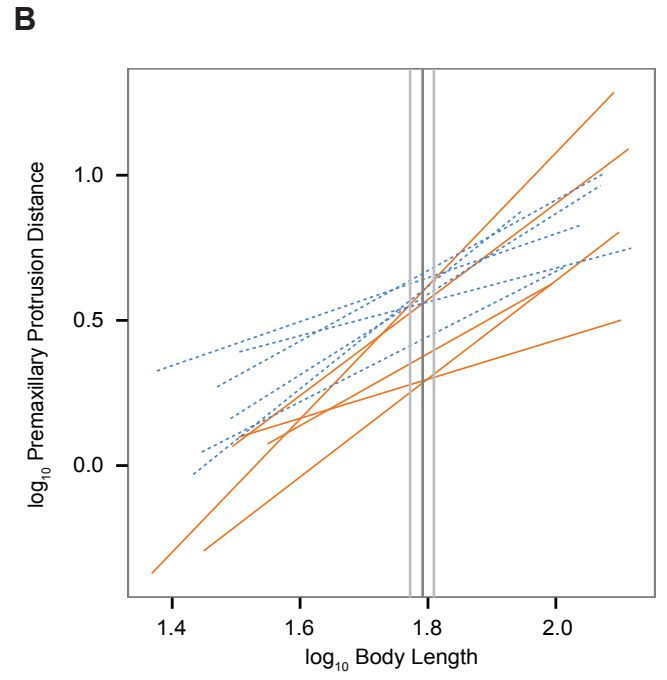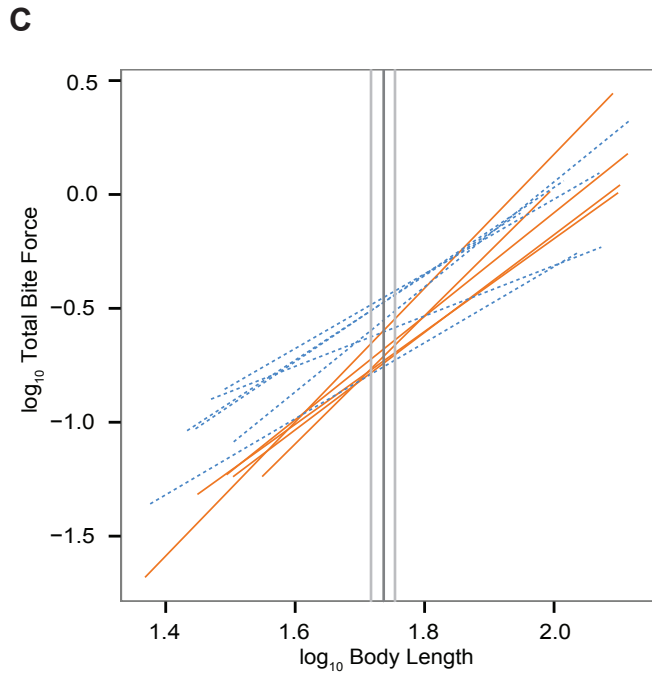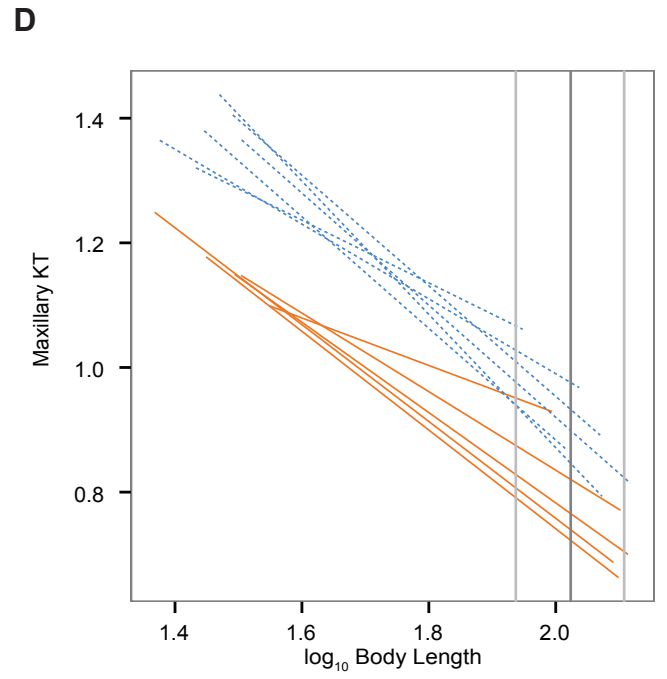

**A**

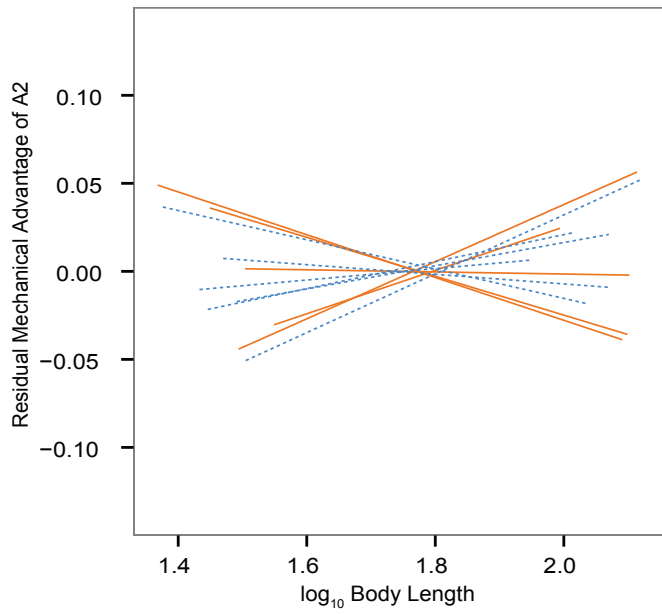

**B**

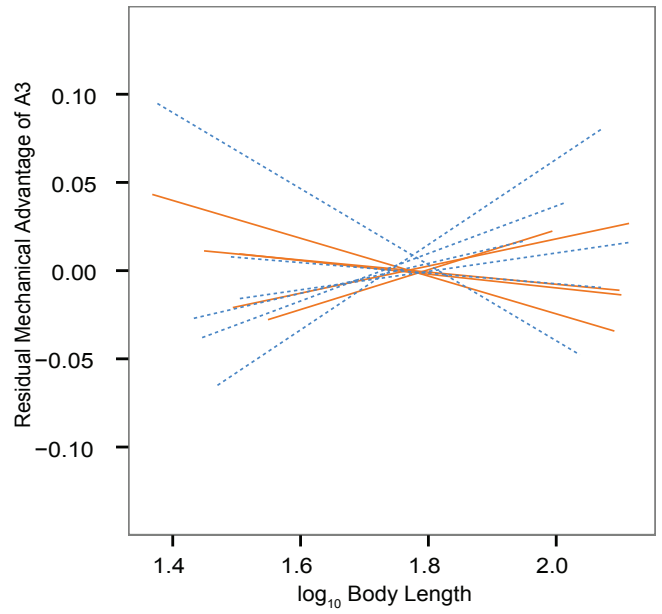

**C**

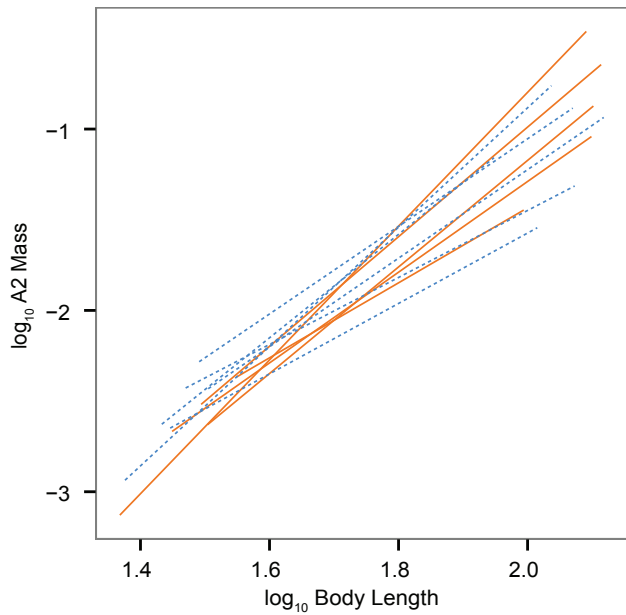

**D**

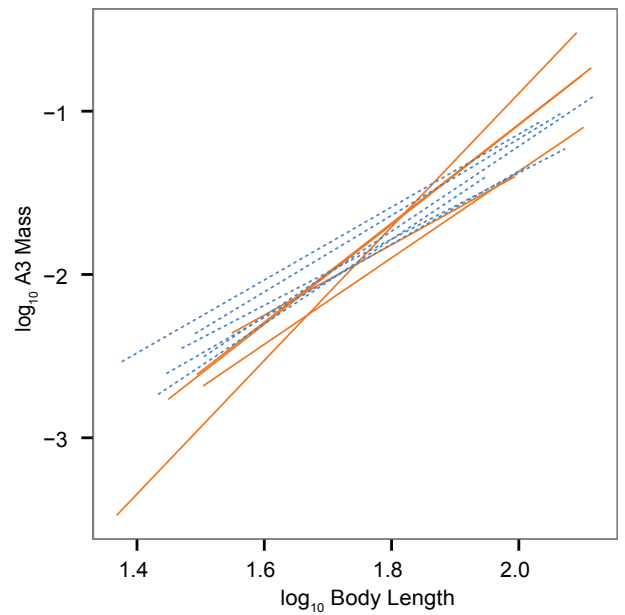

**E**

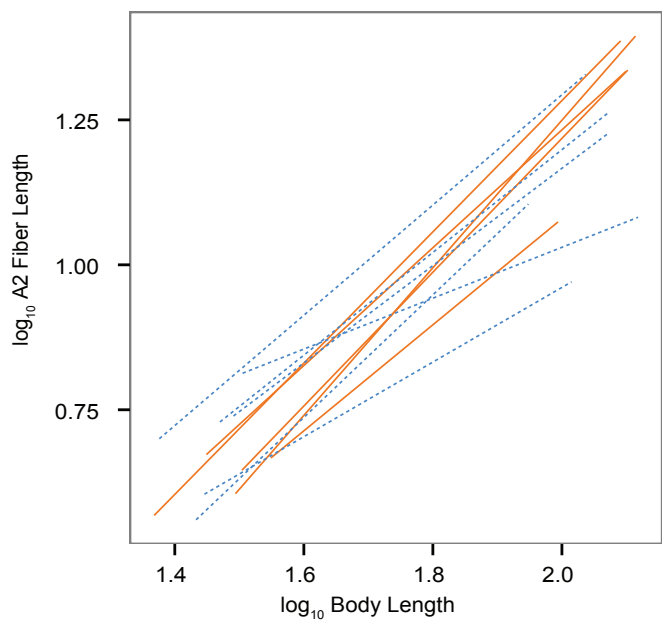

**F**

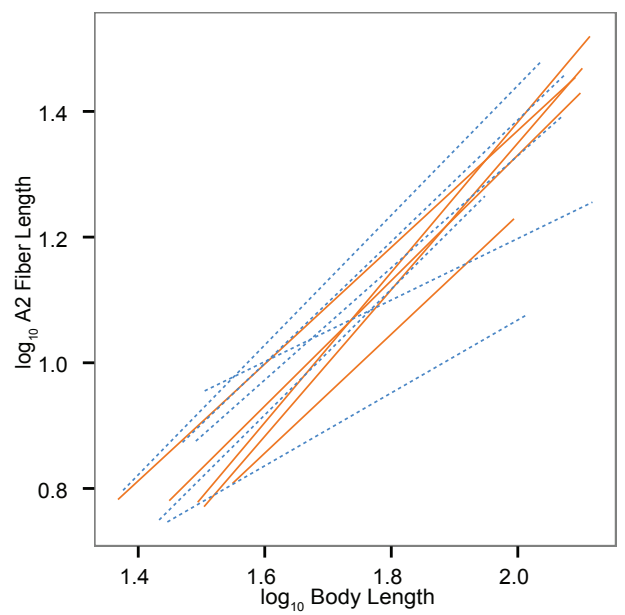



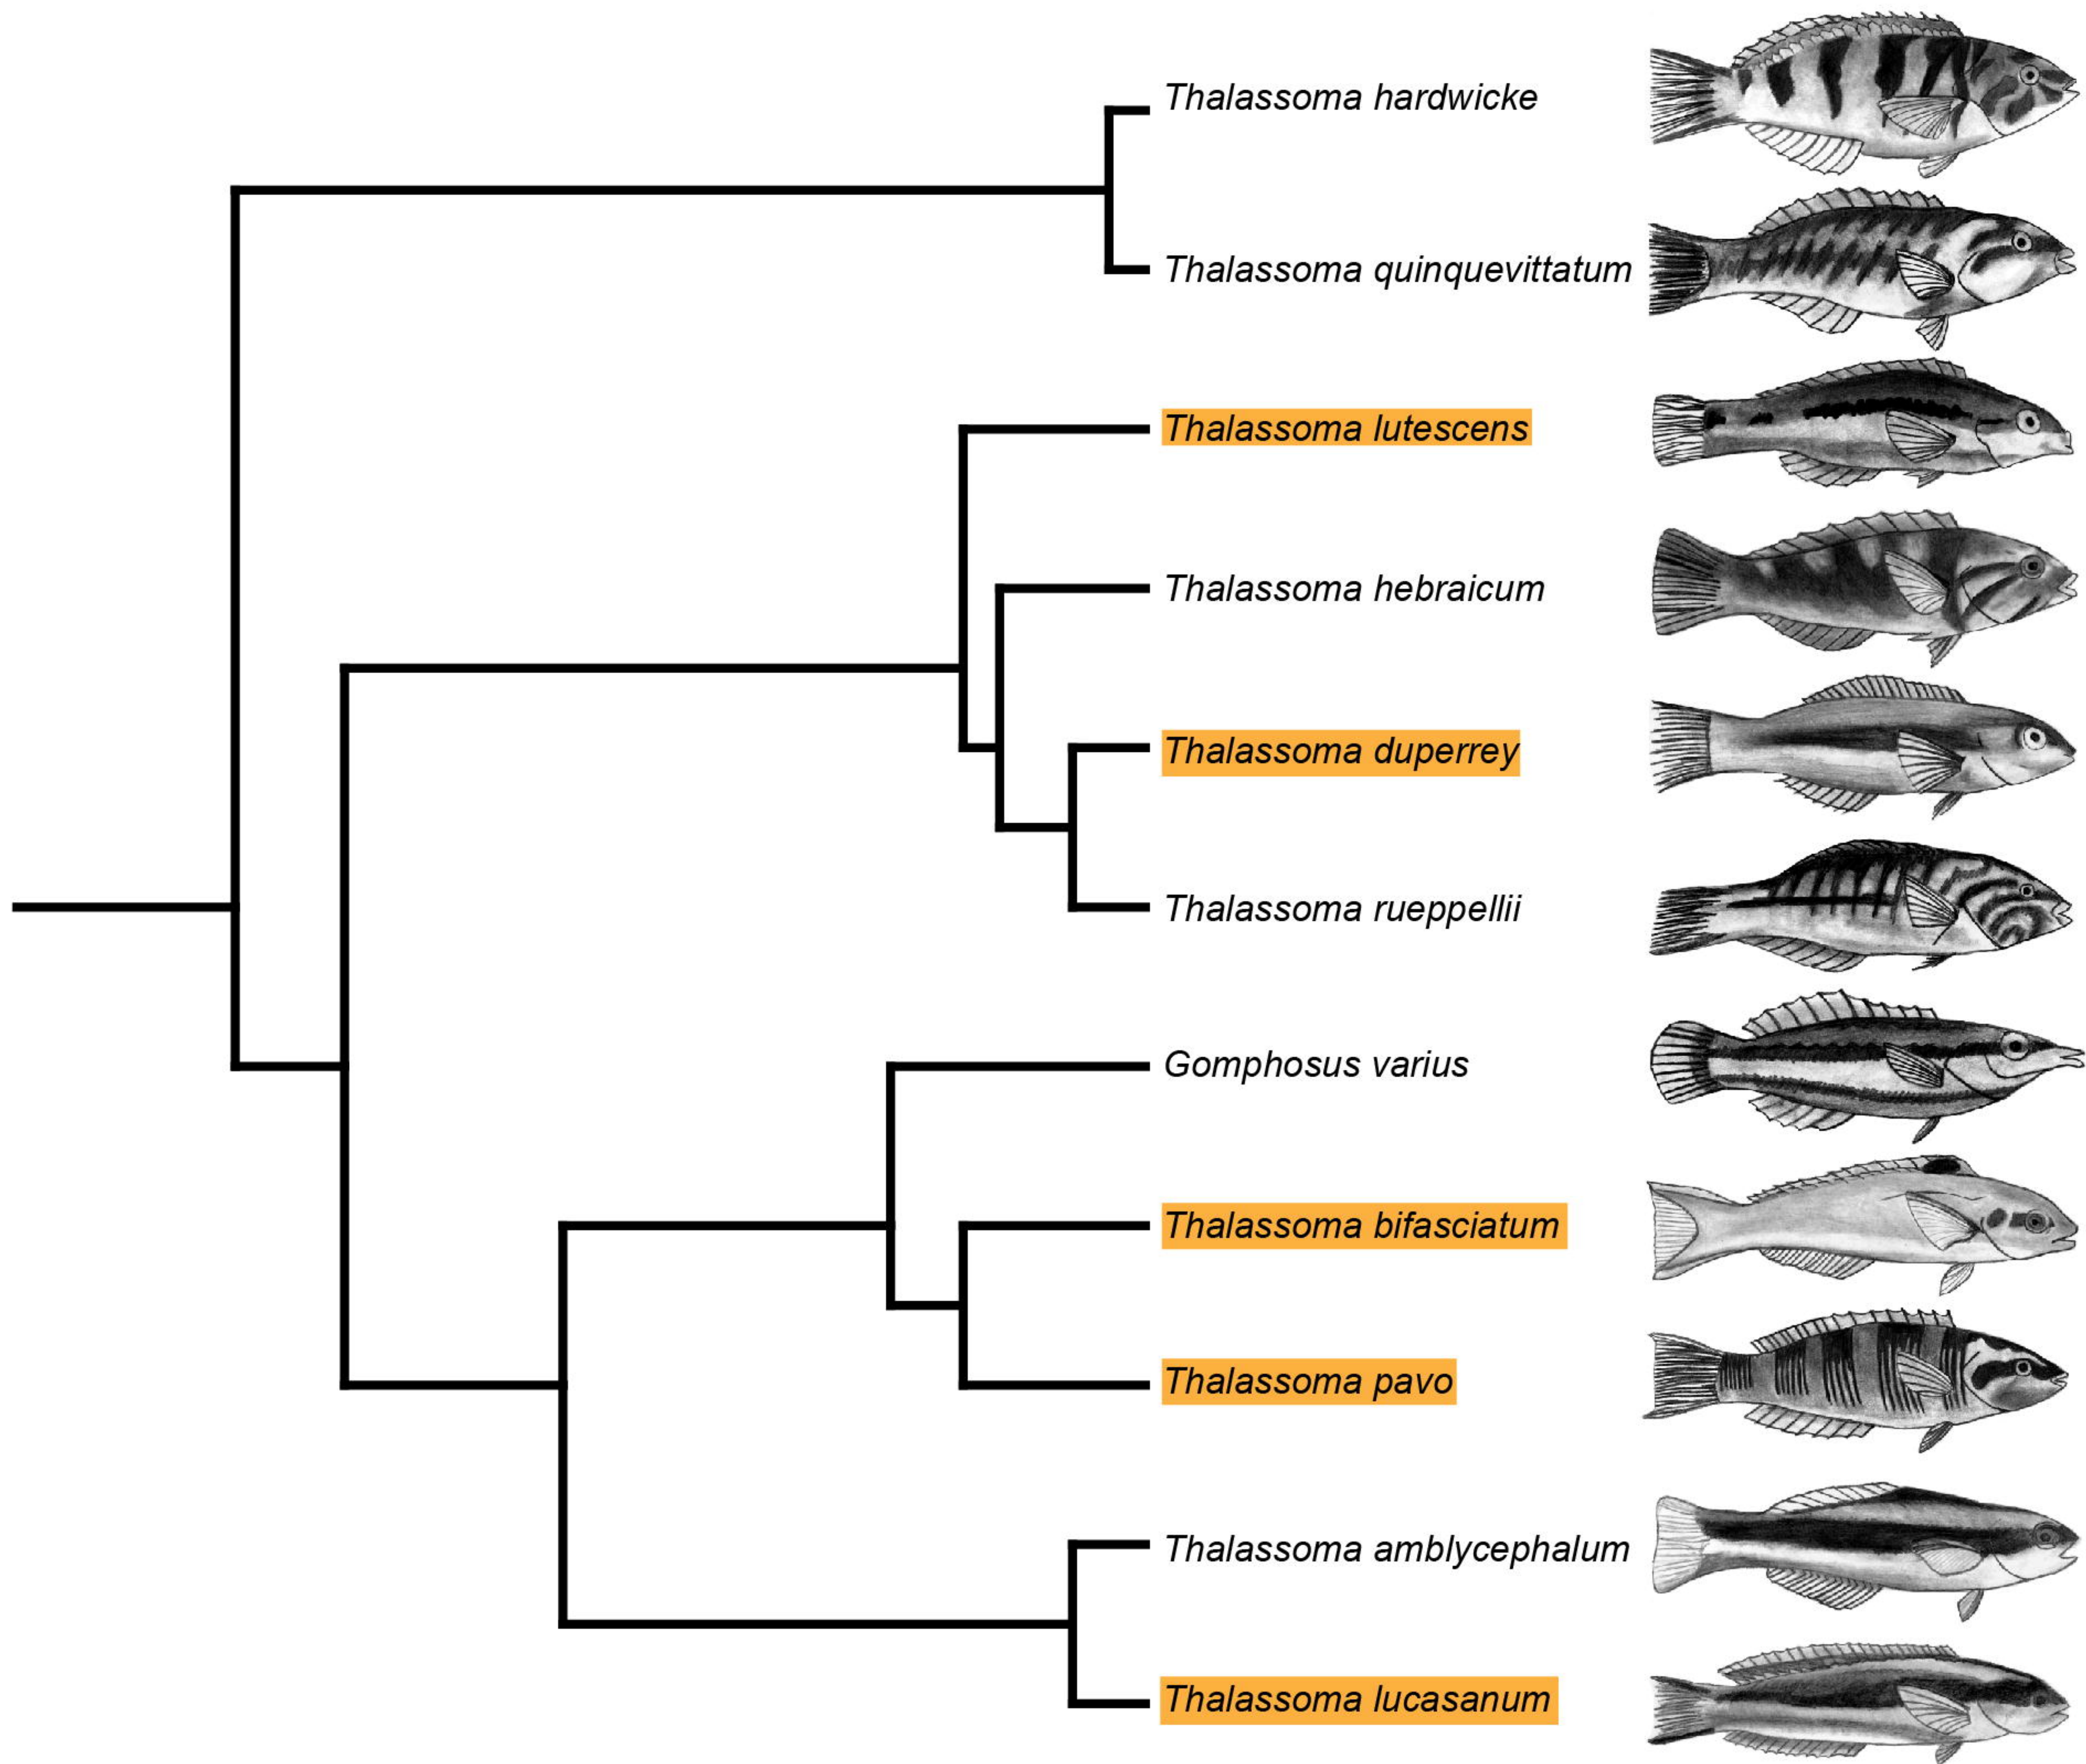



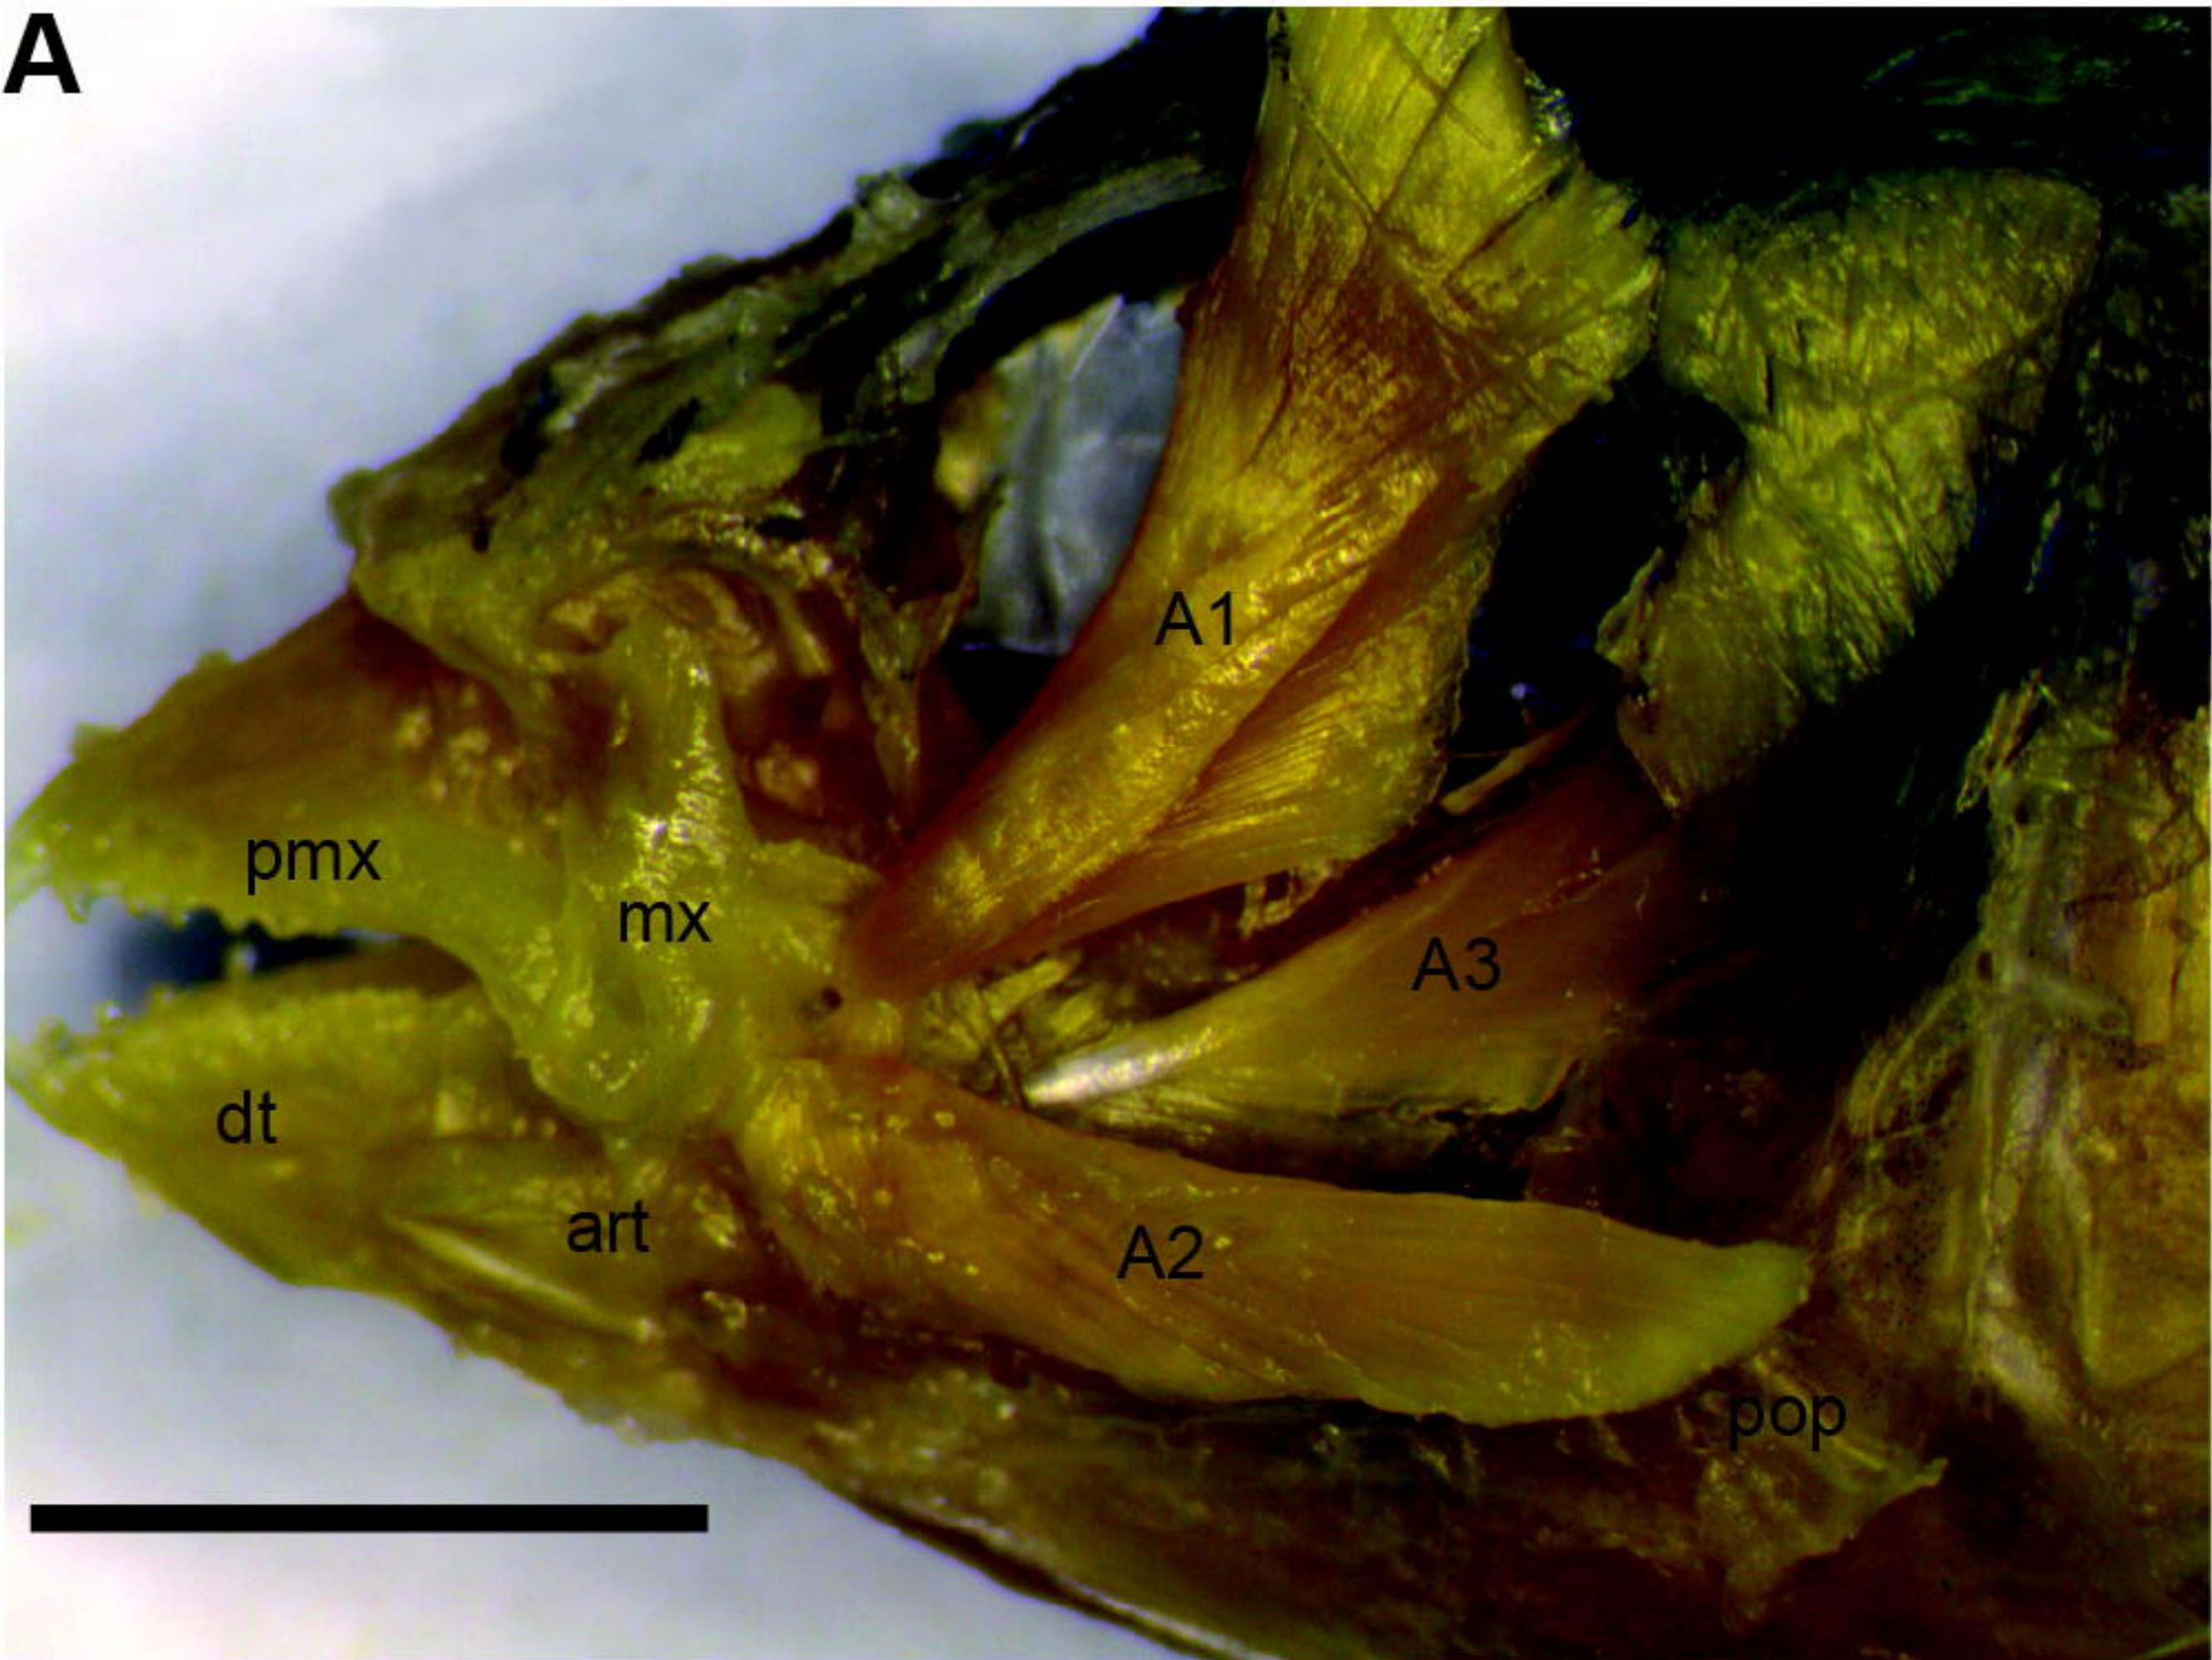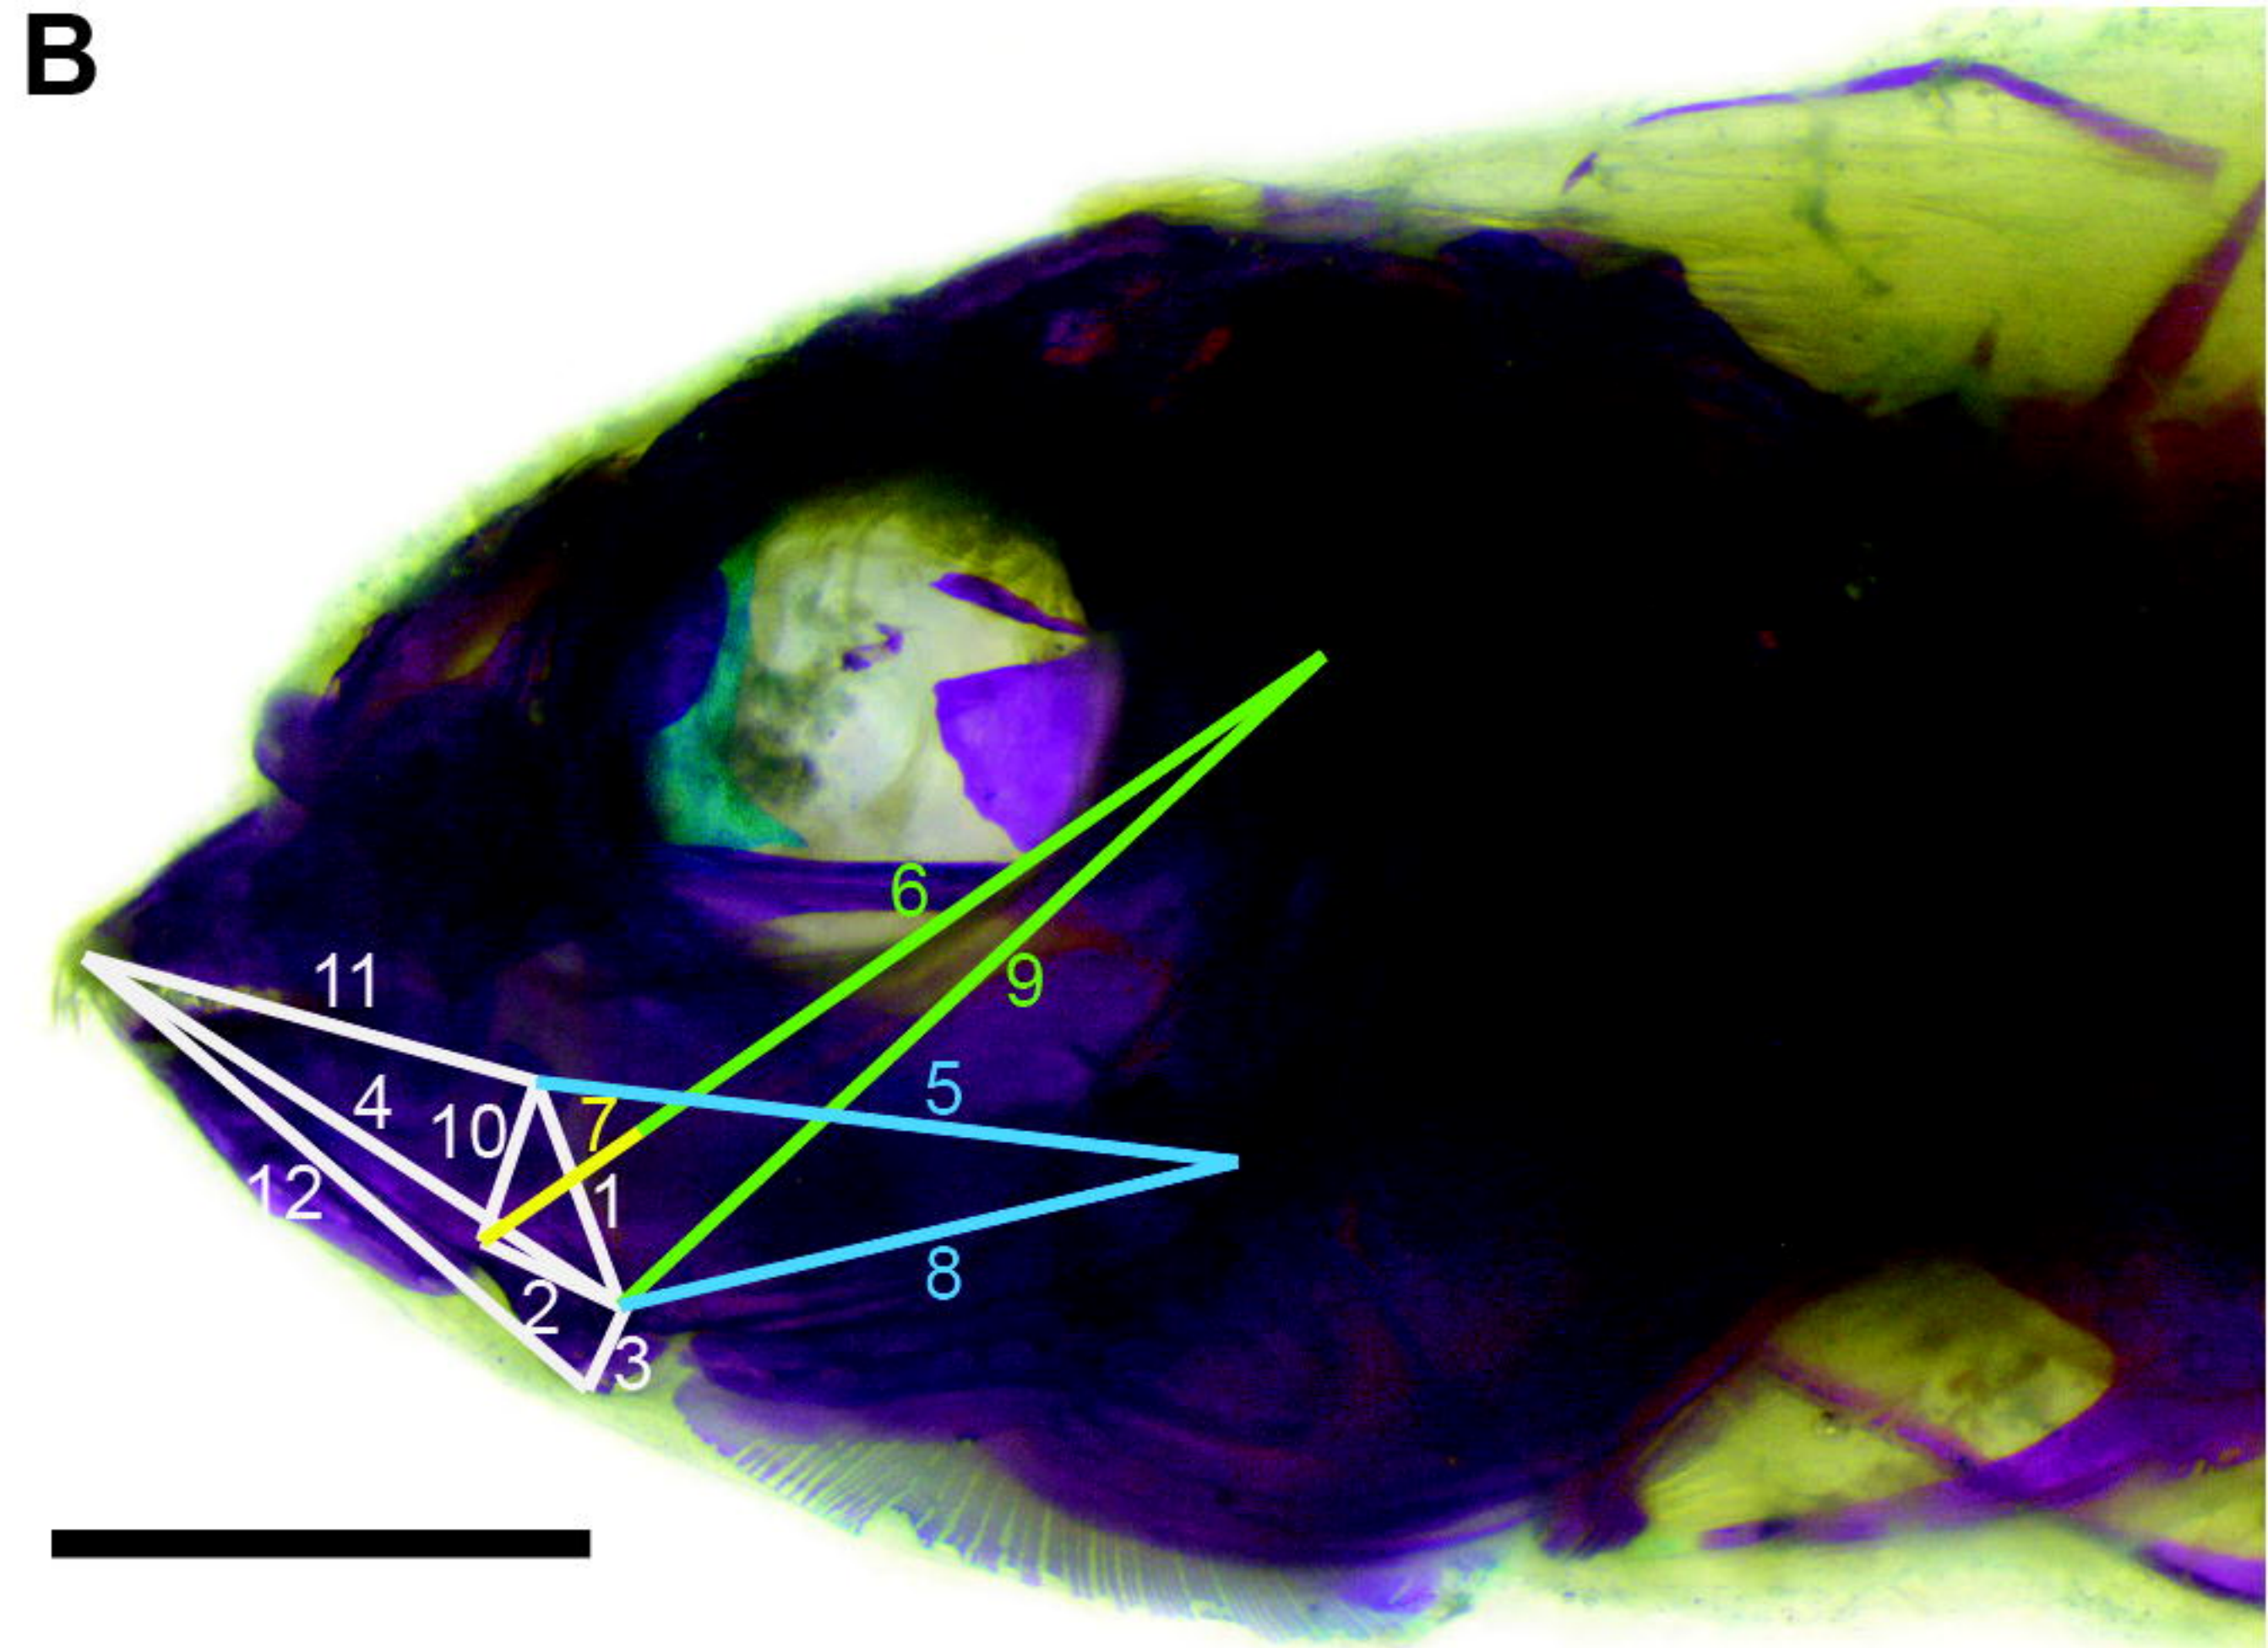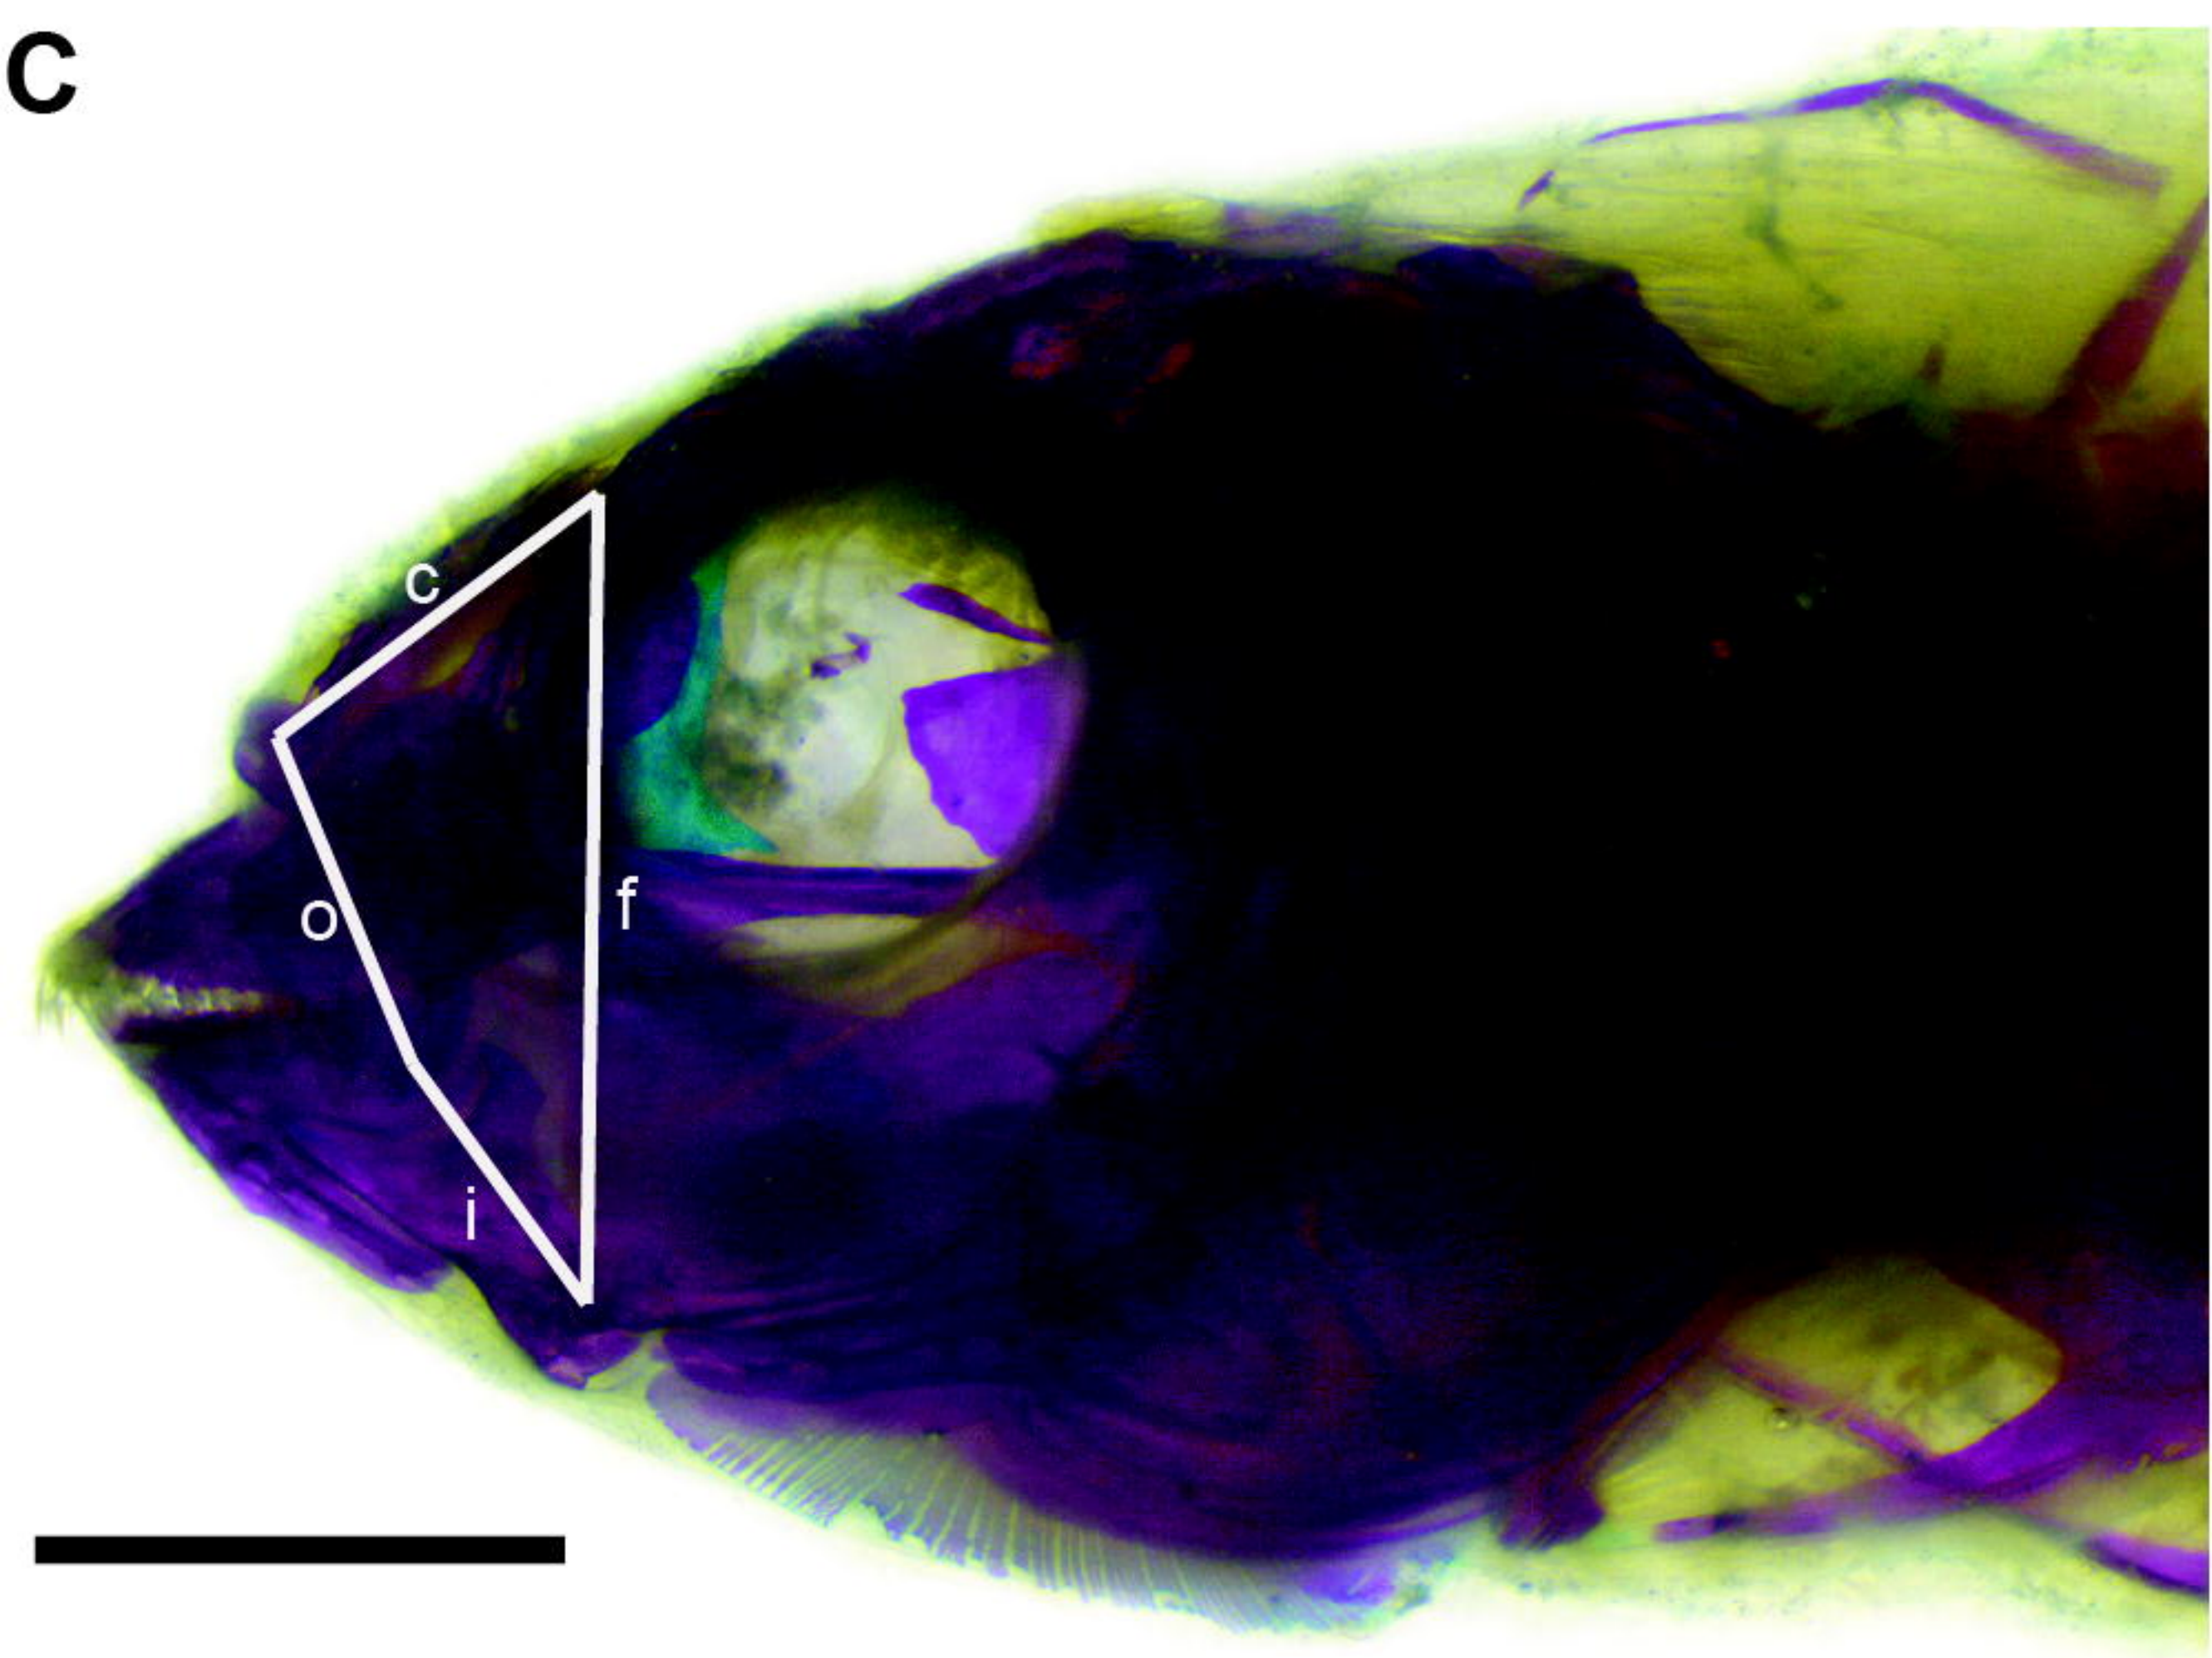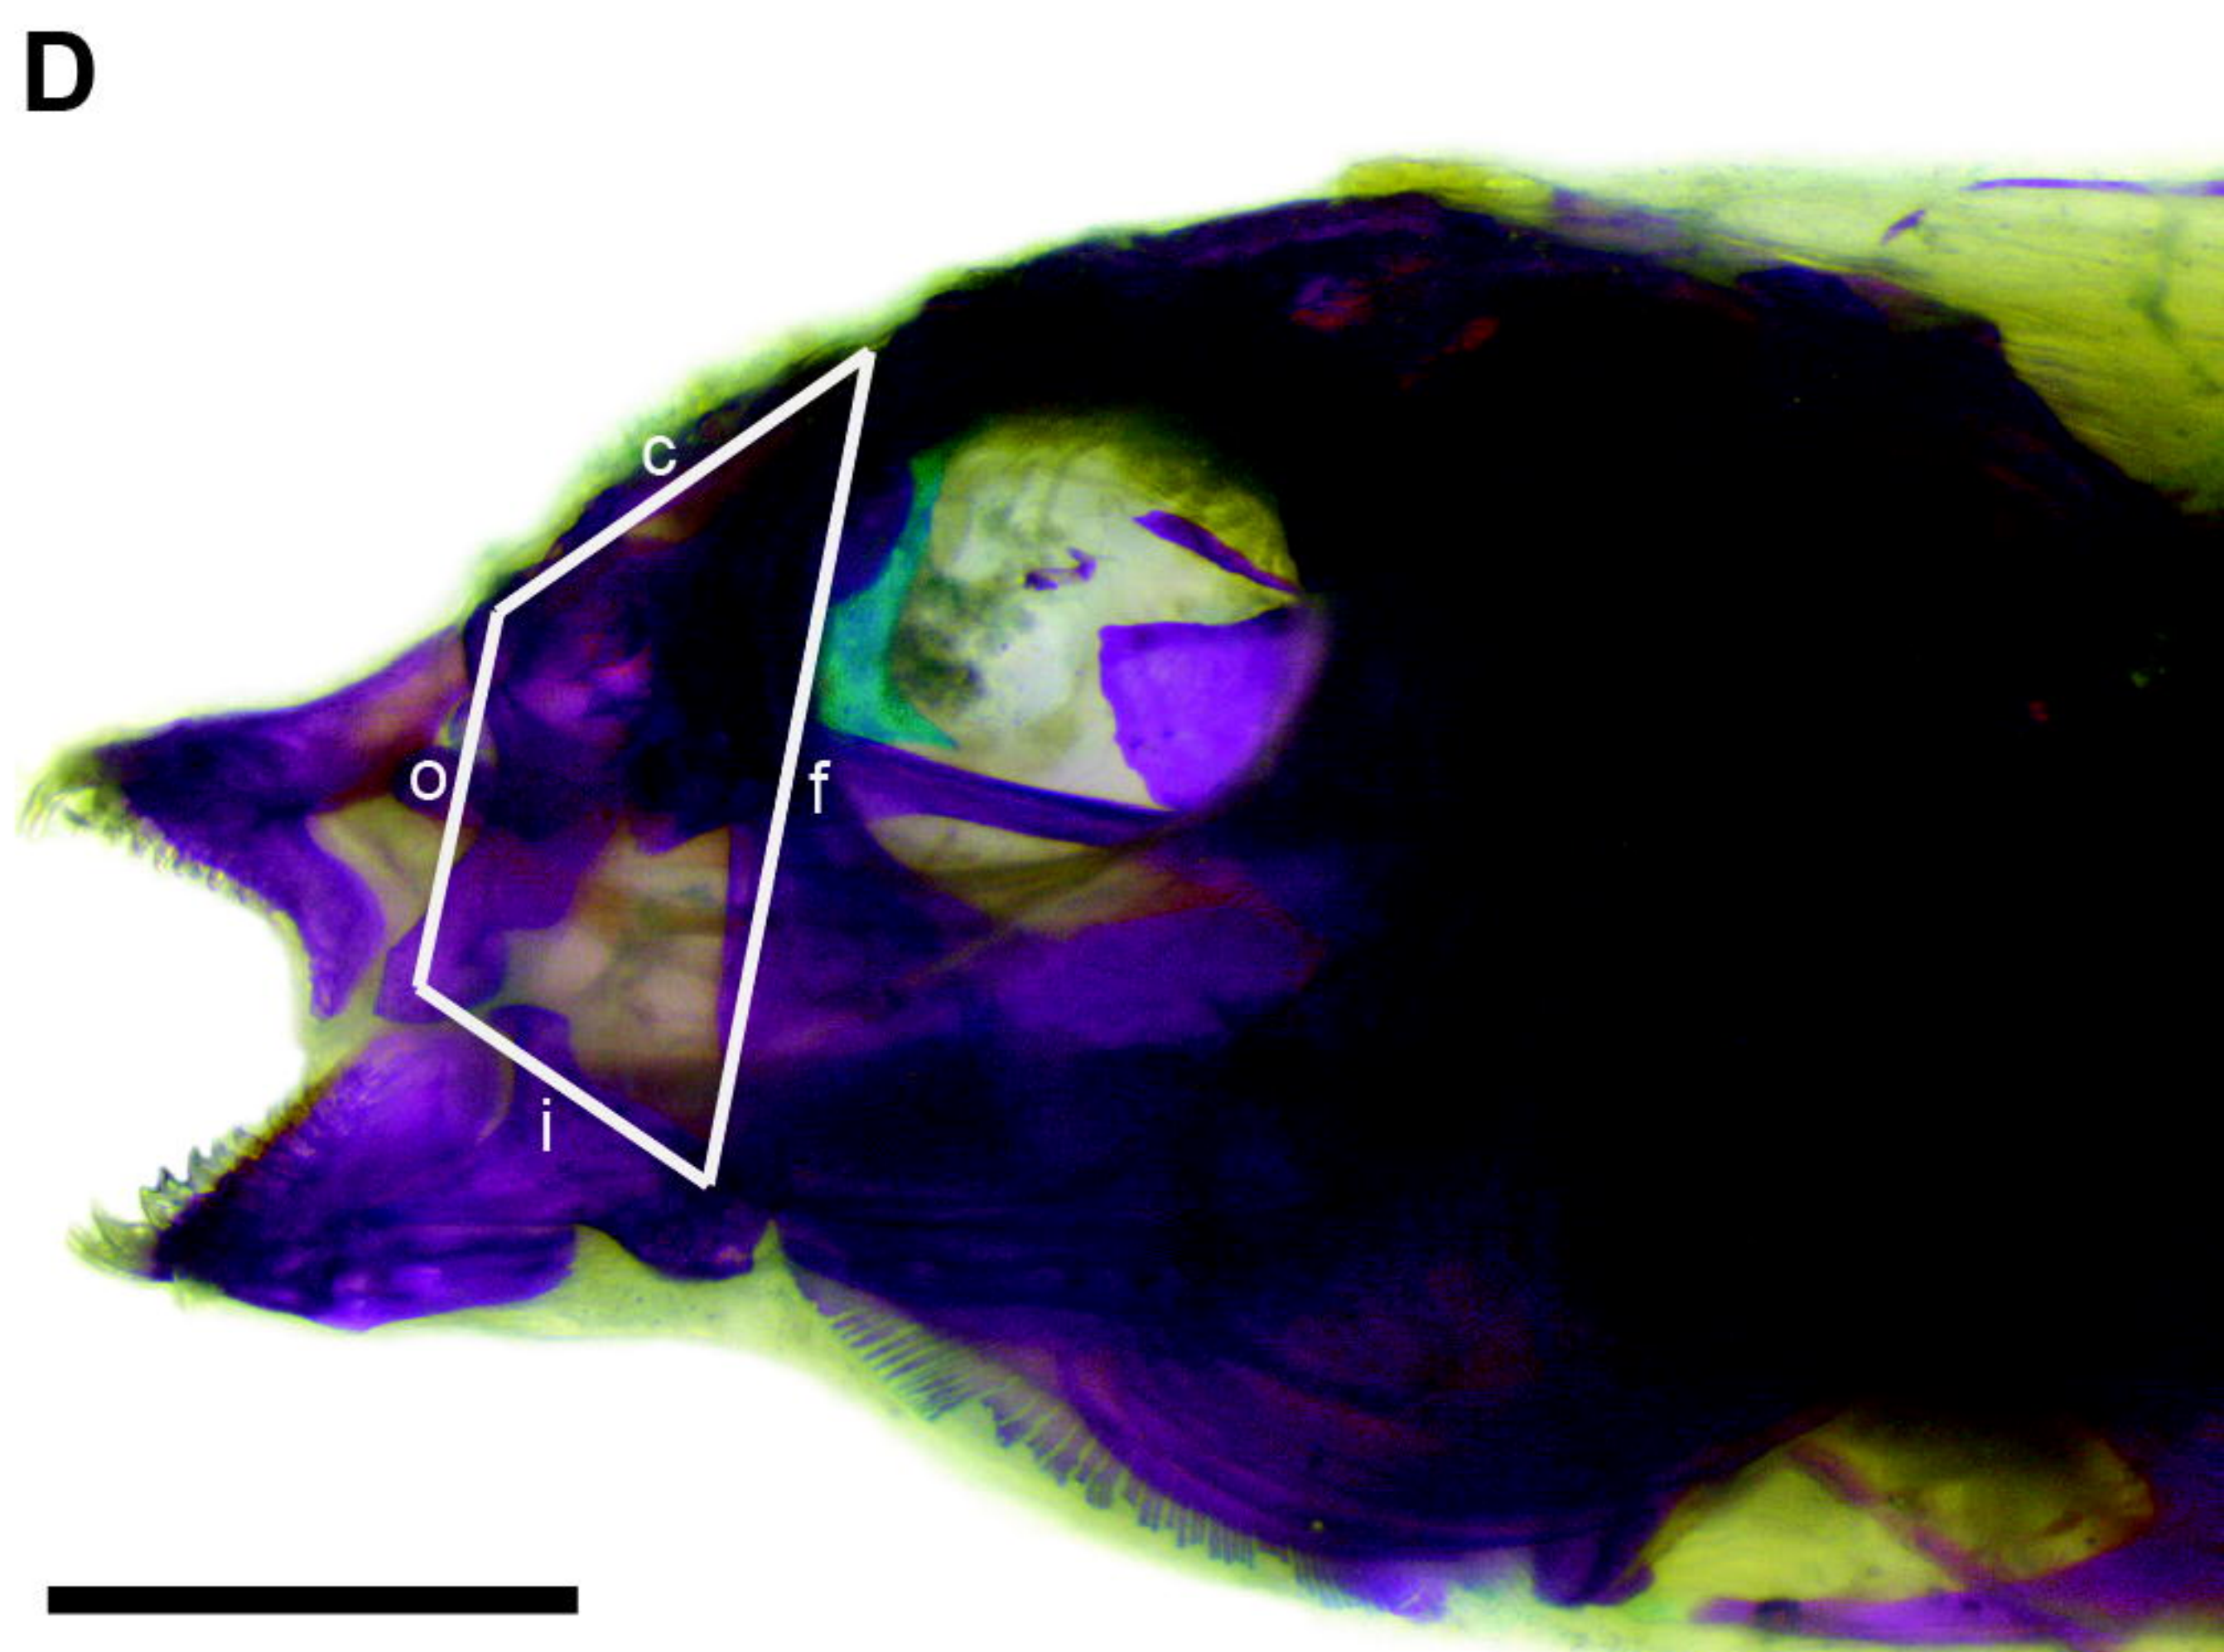

Source: https://cob.silverchair.com/jeb/article-pdf/doi/10.1242/jeb.107680/2037908/jeb_107680.pdf
